# Supplementary material for: Abundance of Plant-Associated Gammaproteobacteria Correlates with Immunostimulatory Activity of Angelica sinensis
Source: Medicines (Basel). 2019 May 31;6(2):62. doi: 10.3390/medicines6020062 (PMC6631519; doi:10.3390/medicines6020062)
Supplement: Supplementary file 1 [file medicines-06-00062-s001.xlsx]

## Sheet: Supplementary Table S1.txt
Activity	Low	Low	Low	Low	Low	Low	High	High	High	High	High	High
Subclass	AS1	AS1	AS1	AS2	AS2	AS2	AS3	AS3	AS3	AS4	AS4	AS4
k__Bacteria|p__Tenericutes|c__Mollicutes|o__Acholeplasmatales|f__Acholeplasmataceae|g__Candidatus Phytoplasma	9	24	55	82	1	5	44659	58491	15280	3	3	3
k__Bacteria|p__Proteobacteria|c__Gammaproteobacteria|o__Pseudomonadales|f__Pseudomonadaceae|g__Pseudomonas	264	184	522	3600	2232	176	5468	12923	4525	11473	30040	3029
k__Bacteria|p__Proteobacteria|c__Gammaproteobacteria|o__Enterobacteriales|f__Enterobacteriaceae|g__Rahnella	114	44	140	109	521	3	9094	24697	6235	6327	11752	3071
k__Bacteria|p__Actinobacteria|c__Actinobacteria|o__Actinomycetales|f__Propionibacteriaceae|g__Propionibacterium	1239	166	904	17165	2455	5996	41	210	12	67	110	41
k__Bacteria|p__Proteobacteria|c__Gammaproteobacteria|o__Enterobacteriales|f__Enterobacteriaceae|g__Erwinia	38	24	116	0	0	4	2733	12301	4087	420	307	1710
k__Bacteria|p__Proteobacteria|c__Gammaproteobacteria|o__Enterobacteriales|f__Enterobacteriaceae|g__	72	127	352	448	2319	348	5676	5584	2935	2535	618	303
k__Bacteria|p__Proteobacteria|c__Alphaproteobacteria|o__Caulobacterales|f__Caulobacteraceae|g__	133	422	302	1814	6692	8936	13	341	26	87	335	48
k__Bacteria|p__Proteobacteria|c__Alphaproteobacteria|o__Rhizobiales|f__Bradyrhizobiaceae|g__Bosea	115	791	411	2145	6547	7009	16	449	13	57	515	51
k__Bacteria|p__Proteobacteria|c__Betaproteobacteria|o__Burkholderiales|f__Oxalobacteraceae|g__Ralstonia	352	1136	693	3102	6562	3330	14	490	26	125	342	59
k__Bacteria|p__Firmicutes|c__Bacilli|o__Bacillales|f__Paenibacillaceae|g__Paenibacillus	724	416	6142	3131	479	1333	49	102	55	975	447	480
k__Bacteria|p__Firmicutes|c__Bacilli|o__Lactobacillales|f__Leuconostocaceae|g__Weissella	312	43	408	158	0	1	2893	6976	1546	1	1	1
k__Bacteria|p__Firmicutes|c__Bacilli|o__Bacillales|f__Bacillaceae|g__Bacillus	449	207	3306	1624	1654	611	69	221	92	787	396	411
k__Bacteria|p__Firmicutes|c__Bacilli|o__Lactobacillales|f__Leuconostocaceae|g__Leuconostoc	105	30	130	152	106	1	1797	4825	2155	13	86	12
k__Bacteria|p__Proteobacteria|c__Gammaproteobacteria|o__Pseudomonadales|f__Moraxellaceae|g__Acinetobacter	111	121	79	1424	5873	83	153	382	142	13	38	13
k__Bacteria|p__Firmicutes|c__Bacilli|o__Lactobacillales|f__Streptococcaceae|g__Streptococcus	105	110	14	2389	3605	278	23	152	10	45	71	7
k__Bacteria|p__Proteobacteria|c__Alphaproteobacteria|o__Rhizobiales|f__Methylobacteriaceae|g__Methylobacterium	150	76	622	2369	1093	1668	3	114	7	60	35	34
k__Bacteria|p__Firmicutes|c__Bacilli|o__Bacillales|f__Staphylococcaceae|g__Staphylococcus	186	86	91	3093	942	181	89	1058	77	16	28	10
k__Bacteria|p__Actinobacteria|c__Actinobacteria|o__Actinomycetales|f__Corynebacteriaceae|g__Corynebacterium	91	141	126	1821	2506	623	3	165	2	13	35	12
k__Bacteria|p__Proteobacteria|c__Alphaproteobacteria|o__Rhizobiales|f__Rhizobiaceae|g__	21	285	65	427	3308	866	6	193	11	50	112	35
k__Bacteria|p__Proteobacteria|c__Alphaproteobacteria|o__Rhizobiales|f__Rhizobiaceae|g__Agrobacterium	44	23	116	354	505	681	27	143	18	1356	1404	630
k__Bacteria|p__Actinobacteria|c__Actinobacteria|o__Actinomycetales|f__Micromonosporaceae|g__Actinoplanes	178	349	1127	15	0	1	37	388	51	789	846	426
k__Bacteria|p__Proteobacteria|c__Betaproteobacteria|o__Burkholderiales|f__Comamonadaceae|g__Delftia	94	103	221	759	1579	1022	3	178	3	17	46	21
k__Bacteria|p__Proteobacteria|c__Alphaproteobacteria|o__Rhizobiales|f__|g__	24	150	116	538	1777	785	6	111	5	109	172	78
k__Bacteria|p__Bacteroidetes|c__Flavobacteriia|o__Flavobacteriales|f__[Weeksellaceae]|g__Chryseobacterium	94	31	119	903	1394	205	15	200	22	183	221	87
k__Bacteria|p__Proteobacteria|c__Betaproteobacteria|o__Burkholderiales|f__Comamonadaceae|g__	129	99	548	831	1277	112	19	158	27	84	62	24
k__Bacteria|p__Actinobacteria|c__Actinobacteria|o__Actinomycetales|f__Micrococcaceae|g__	23	21	46	1760	184	269	30	308	60	121	43	398
k__Bacteria|p__Firmicutes|c__Clostridia|o__Clostridiales|f__Peptostreptococcaceae|g__	208	123	842	1327	220	237	10	39	14	12	1	5
k__Bacteria|p__Proteobacteria|c__Gammaproteobacteria|o__Xanthomonadales|f__Xanthomonadaceae|g__Stenotrophomonas	25	4	44	197	281	2116	2	7	1	88	53	37
k__Bacteria|p__Firmicutes|c__Bacilli|o__Bacillales|f__Thermoactinomycetaceae|g__	273	92	1256	541	131	208	5	13	8	17	39	38
k__Bacteria|p__Firmicutes|c__Bacilli|o__Bacillales|f__Planococcaceae|g__Sporosarcina	52	28	516	45	4	53	13	22	15	1693	156	22
k__Bacteria|p__Proteobacteria|c__Gammaproteobacteria|o__Pasteurellales|f__Pasteurellaceae|g__Haemophilus	43	26	8	1579	574	49	10	6	0	17	33	3
k__Bacteria|p__Proteobacteria|c__Gammaproteobacteria|o__Enterobacteriales|f__Enterobacteriaceae|g__Pantoea	0	4	47	0	0	0	198	1140	163	556	83	82
k__Bacteria|p__Bacteroidetes|c__Flavobacteriia|o__Flavobacteriales|f__Flavobacteriaceae|g__Flavobacterium	12	11	83	7	17	2	13	36	15	788	852	337
k__Bacteria|p__Firmicutes|c__Clostridia|o__Clostridiales|f__Clostridiaceae|g__	200	112	846	563	158	54	4	42	14	33	26	14
k__Bacteria|p__Proteobacteria|c__Gammaproteobacteria|o__Xanthomonadales|f__Xanthomonadaceae|g__	56	26	137	40	61	3	422	609	275	94	129	124
k__Bacteria|p__Proteobacteria|c__Alphaproteobacteria|o__Rhizobiales|f__Hyphomicrobiaceae|g__Devosia	13	19	74	70	313	0	4	91	17	534	524	302
k__Bacteria|p__Actinobacteria|c__Actinobacteria|o__Actinomycetales|f__Microbacteriaceae|g__Microbacterium	32	13	69	218	23	72	33	28	14	552	569	259
k__Bacteria|p__Actinobacteria|c__Actinobacteria|o__Actinomycetales|f__Micrococcaceae|g__Kocuria	29	7	64	365	1141	133	3	41	4	9	10	3
k__Bacteria|p__Actinobacteria|c__Actinobacteria|o__Actinomycetales|f__Nocardiaceae|g__Rhodococcus	7	2	5	111	0	0	9	61	7	658	582	318
k__Bacteria|p__Proteobacteria|c__Alphaproteobacteria|o__Sphingomonadales|f__Sphingomonadaceae|g__Sphingomonas	16	18	15	632	204	197	65	211	48	109	131	64
k__Bacteria|p__Actinobacteria|c__Actinobacteria|o__Actinomycetales|f__Nocardioidaceae|g__Aeromicrobium	3	7	10	69	100	0	7	32	8	497	640	237
k__Bacteria|p__Bacteroidetes|c__Sphingobacteriia|o__Sphingobacteriales|f__Sphingobacteriaceae|g__Pedobacter	28	5	105	117	174	82	6	57	10	353	384	168
k__Bacteria|p__Proteobacteria|c__Gammaproteobacteria|o__Enterobacteriales|f__Enterobacteriaceae|g__Serratia	19	11	106	21	1	0	753	341	144	24	1	0
k__Bacteria|p__Actinobacteria|c__Actinobacteria|o__Actinomycetales|f__Micrococcaceae|g__Rothia	60	44	55	1162	51	0	7	15	0	7	5	0
k__Bacteria|p__Firmicutes|c__Bacilli|o__Bacillales|f__Bacillaceae|g__	82	9	499	208	176	0	40	90	51	61	33	36
k__Bacteria|p__Firmicutes|c__Clostridia|o__Clostridiales|f__Clostridiaceae|g__Clostridium	107	65	453	115	1	60	14	13	17	172	138	111
k__Bacteria|p__Bacteroidetes|c__Sphingobacteriia|o__Sphingobacteriales|f__Sphingobacteriaceae|g__	20	10	120	44	0	0	90	350	65	232	218	110
k__Bacteria|p__Actinobacteria|c__Actinobacteria|o__Actinomycetales|f__Cellulomonadaceae|g__Cellulomonas	18	1	15	148	0	468	11	23	11	190	242	109
k__Bacteria|p__Actinobacteria|c__Actinobacteria|o__Actinomycetales|f__Micromonosporaceae|g__	38	30	485	0	60	63	12	184	27	123	90	92
k__Bacteria|p__Firmicutes|c__Bacilli|o__Lactobacillales|f__|g__	97	73	468	29	0	0	56	267	106	0	0	0
k__Bacteria|p__Bacteroidetes|c__Cytophagia|o__Cytophagales|f__Cytophagaceae|g__Hymenobacter	1	2	4	131	333	555	1	15	0	8	11	0
k__Bacteria|p__Proteobacteria|c__Betaproteobacteria|o__Burkholderiales|f__Oxalobacteraceae|g__	33	53	150	238	135	16	57	177	38	70	53	38
k__Bacteria|p__Actinobacteria|c__Actinobacteria|o__Actinomycetales|f__Micrococcaceae|g__Micrococcus	12	2	44	380	113	486	1	0	0	1	2	6
k__Bacteria|p__Proteobacteria|c__Gammaproteobacteria|o__Pseudomonadales|f__Moraxellaceae|g__	16	10	145	171	13	0	89	404	63	29	60	15
k__Bacteria|p__Bacteroidetes|c__Cytophagia|o__Cytophagales|f__Cytophagaceae|g__Dyadobacter	124	59	490	0	0	226	7	37	2	19	25	9
k__Bacteria|p__Firmicutes|c__Bacilli|o__Bacillales|f__|g__	43	12	324	187	21	143	3	20	6	90	75	68
k__Bacteria|p__Actinobacteria|c__Actinobacteria|o__Actinomycetales|f__Promicromonosporaceae|g__Cellulosimicrobium	0	0	6	0	0	0	15	15	2	323	421	175
k__Bacteria|p__Actinobacteria|c__Actinobacteria|o__Actinomycetales|f__Micrococcaceae|g__Arthrobacter	15	31	124	15	127	0	64	385	81	17	57	20
k__Bacteria|p__Proteobacteria|c__Gammaproteobacteria|o__Pseudomonadales|f__Pseudomonadaceae|g__	14	3	2	173	6	0	13	63	5	180	425	38
k__Bacteria|p__Proteobacteria|c__Alphaproteobacteria|o__Rhodobacterales|f__Rhodobacteraceae|g__Paracoccus	1	12	41	524	147	143	1	17	0	5	2	1
k__Bacteria|p__Firmicutes|c__Bacilli|o__Lactobacillales|f__Enterococcaceae|g__Enterococcus	108	0	31	0	0	0	28	93	74	221	150	124
k__Bacteria|p__Actinobacteria|c__Actinobacteria|o__Actinomycetales|f__|g__	20	88	73	111	66	299	13	82	20	17	16	8
k__Bacteria|p__Actinobacteria|c__Actinobacteria|o__Actinomycetales|f__Streptomycetaceae|g__Streptomyces	68	2	131	417	0	0	22	104	12	17	17	14
k__Bacteria|p__Proteobacteria|c__Betaproteobacteria|o__Burkholderiales|f__Comamonadaceae|g__Comamonas	6	18	0	172	550	0	0	29	1	4	10	0
k__Bacteria|p__Firmicutes|c__Bacilli|o__Lactobacillales|f__Lactobacillaceae|g__Lactobacillus	1	2	8	291	459	0	1	16	2	0	5	2
k__Bacteria|p__Firmicutes|c__Clostridia|o__Clostridiales|f__Lachnospiraceae|g__Coprococcus	31	17	182	147	188	0	7	18	7	89	68	33
k__Bacteria|p__Bacteroidetes|c__Flavobacteriia|o__Flavobacteriales|f__Flavobacteriaceae|g__	15	1	52	231	371	13	3	55	4	21	17	2
k__Bacteria|p__Firmicutes|c__Clostridia|o__Clostridiales|f__Clostridiaceae|g__SMB53	86	33	98	292	45	202	2	0	4	1	1	0
k__Bacteria|p__Proteobacteria|c__Betaproteobacteria|o__Burkholderiales|f__Burkholderiaceae|g__Burkholderia	7	7	36	81	0	0	38	359	61	70	48	40
k__Bacteria|p__Proteobacteria|c__Alphaproteobacteria|o__Rhizobiales|f__Rhizobiaceae|g__Liberibacter	0	0	0	0	0	0	133	527	61	0	0	0
k__Bacteria|p__Actinobacteria|c__Actinobacteria|o__Actinomycetales|f__Pseudonocardiaceae|g__Pseudonocardia	16	4	118	102	74	192	15	52	14	30	44	25
k__Bacteria|p__Actinobacteria|c__Actinobacteria|o__Actinomycetales|f__Streptomycetaceae|g__	150	152	353	1	0	0	1	8	3	6	5	1
k__Bacteria|p__Firmicutes|c__Bacilli|o__Bacillales|f__Thermoactinomycetaceae|g__Shimazuella	0	0	22	237	0	332	1	0	0	17	7	6
k__Bacteria|p__Proteobacteria|c__Alphaproteobacteria|o__Sphingomonadales|f__Sphingomonadaceae|g__Novosphingobium	8	4	24	99	0	0	43	242	26	79	78	19
k__Bacteria|p__Firmicutes|c__Clostridia|o__Clostridiales|f__[Tissierellaceae]|g__Anaerococcus	23	0	48	427	86	0	0	13	0	2	10	1
k__Bacteria|p__Actinobacteria|c__Actinobacteria|o__Actinomycetales|f__Mycobacteriaceae|g__Mycobacterium	7	9	33	95	148	2	10	78	15	95	75	31
k__Bacteria|p__Actinobacteria|c__Actinobacteria|o__Actinomycetales|f__Actinomycetaceae|g__Actinomyces	20	12	14	144	349	0	1	41	0	0	3	3
k__Bacteria|p__Bacteroidetes|c__[Saprospirae]|o__[Saprospirales]|f__Chitinophagaceae|g__	8	5	52	2	0	0	32	222	36	82	109	36
k__Bacteria|p__Firmicutes|c__Bacilli|o__Bacillales|f__Paenibacillaceae|g__Cohnella	32	17	226	124	0	0	2	10	8	75	38	34
k__Bacteria|p__Actinobacteria|c__Actinobacteria|o__Actinomycetales|f__Microbacteriaceae|g__	15	1	16	53	48	12	27	95	42	101	84	56
k__Bacteria|p__Proteobacteria|c__Alphaproteobacteria|o__Sphingomonadales|f__Sphingomonadaceae|g__Sphingobium	9	15	25	30	0	0	28	165	17	98	106	53
k__Bacteria|p__Firmicutes|c__Bacilli|o__Bacillales|f__Planococcaceae|g__	44	22	140	94	1	0	9	34	6	96	36	41
k__Bacteria|p__Bacteroidetes|c__Sphingobacteriia|o__Sphingobacteriales|f__Sphingobacteriaceae|g__Sphingobacterium	4	0	1	0	353	0	8	15	4	61	43	28
k__Bacteria|p__Firmicutes|c__Clostridia|o__Clostridiales|f__Ruminococcaceae|g__	8	17	165	73	0	21	7	12	5	90	65	53
k__Bacteria|p__Firmicutes|c__Bacilli|o__Bacillales|f__Paenibacillaceae|g__	1	20	66	298	0	0	6	6	3	28	30	23
k__Bacteria|p__TM7|c__TM7-3|o__|f__|g__	17	2	32	48	0	0	25	35	34	118	115	52
k__Bacteria|p__Firmicutes|c__Bacilli|o__Gemellales|f__Gemellaceae|g__Gemella	16	21	0	235	185	0	0	0	0	13	4	1
k__Bacteria|p__Firmicutes|c__Bacilli|o__Lactobacillales|f__Carnobacteriaceae|g__Isobaculum	3	0	22	0	0	0	38	208	96	27	44	30
k__Bacteria|p__Bacteroidetes|c__[Saprospirae]|o__[Saprospirales]|f__Chitinophagaceae|g__Segetibacter	19	14	41	0	0	350	0	14	2	9	8	2
k__Bacteria|p__Actinobacteria|c__Actinobacteria|o__Actinomycetales|f__Geodermatophilaceae|g__	8	88	39	29	80	162	2	32	2	10	4	0
k__Bacteria|p__Actinobacteria|c__Actinobacteria|o__Actinomycetales|f__Cellulomonadaceae|g__Actinotalea	0	212	212	31	0	0	0	0	0	0	0	0
k__Bacteria|p__Firmicutes|c__Bacilli|o__Bacillales|f__Paenibacillaceae|g__Brevibacillus	3	3	48	135	0	174	1	0	3	35	22	25
k__Bacteria|p__Proteobacteria|c__Betaproteobacteria|o__Burkholderiales|f__Oxalobacteraceae|g__Janthinobacterium	0	2	85	45	139	0	30	91	21	17	11	8
k__Bacteria|p__Actinobacteria|c__Actinobacteria|o__Actinomycetales|f__Nocardioidaceae|g__	16	7	42	0	138	0	26	139	19	23	22	13
k__Bacteria|p__Firmicutes|c__Bacilli|o__Lactobacillales|f__Enterococcaceae|g__Vagococcus	109	52	276	0	0	0	0	0	1	0	3	0
k__Bacteria|p__Proteobacteria|c__Alphaproteobacteria|o__Rhizobiales|f__Xanthobacteraceae|g__	13	8	49	3	0	0	3	3	1	158	130	58
k__Bacteria|p__Proteobacteria|c__Gammaproteobacteria|o__Aeromonadales|f__Aeromonadaceae|g__	17	1	44	23	258	0	7	50	4	2	5	3
k__Bacteria|p__Firmicutes|c__Bacilli|o__Bacillales|f__Alicyclobacillaceae|g__Alicyclobacillus	23	8	159	27	0	0	1	13	9	75	45	49
k__Bacteria|p__Proteobacteria|c__Alphaproteobacteria|o__Caulobacterales|f__Caulobacteraceae|g__Brevundimonas	0	0	0	45	0	0	0	1	0	145	159	56
k__Bacteria|p__Firmicutes|c__Bacilli|o__Lactobacillales|f__Aerococcaceae|g__Facklamia	0	8	15	21	351	1	0	8	0	0	0	0
k__Bacteria|p__Firmicutes|c__Bacilli|o__Bacillales|f__Paenibacillaceae|g__Ammoniphilus	0	0	0	79	0	297	0	0	0	9	4	9
k__Bacteria|p__Firmicutes|c__Bacilli|o__Bacillales|f__Listeriaceae|g__	59	25	149	0	148	0	2	11	0	0	2	0
k__Bacteria|p__Actinobacteria|c__Thermoleophilia|o__Gaiellales|f__Gaiellaceae|g__	0	0	36	0	100	0	37	141	40	9	8	6
k__Bacteria|p__Proteobacteria|c__Gammaproteobacteria|o__Pseudomonadales|f__Moraxellaceae|g__Psychrobacter	37	17	47	158	98	0	5	11	0	0	4	0
k__Bacteria|p__Actinobacteria|c__Actinobacteria|o__Actinomycetales|f__Brevibacteriaceae|g__Brevibacterium	14	0	0	159	194	0	0	5	2	1	0	0
k__Bacteria|p__Actinobacteria|c__Actinobacteria|o__Actinomycetales|f__Microbacteriaceae|g__Agromyces	0	2	10	32	0	0	23	121	25	57	66	28
k__Bacteria|p__Proteobacteria|c__Alphaproteobacteria|o__Sphingomonadales|f__Sphingomonadaceae|g__Kaistobacter	1	3	61	190	14	0	13	39	21	15	4	2
k__Bacteria|p__Actinobacteria|c__Actinobacteria|o__Actinomycetales|f__Geodermatophilaceae|g__Modestobacter	1	38	46	145	0	94	2	11	0	10	6	3
k__Bacteria|p__Acidobacteria|c__Acidobacteriia|o__Acidobacteriales|f__Acidobacteriaceae|g__	3	0	6	0	182	127	1	24	4	7	0	0
k__Bacteria|p__Firmicutes|c__Bacilli|o__Bacillales|f__Staphylococcaceae|g__Salinicoccus	0	0	0	20	121	208	0	0	1	0	0	1
k__Bacteria|p__Actinobacteria|c__Actinobacteria|o__Actinomycetales|f__Dermabacteraceae|g__Brachybacterium	9	0	0	81	155	80	7	6	1	4	0	1
k__Bacteria|p__Proteobacteria|c__Gammaproteobacteria|o__Enterobacteriales|f__Enterobacteriaceae|g__Providencia	89	35	210	0	0	0	0	0	0	1	0	0
k__Bacteria|p__Proteobacteria|c__Betaproteobacteria|o__Neisseriales|f__Neisseriaceae|g__	0	20	0	6	298	1	1	0	0	0	4	1
k__Bacteria|p__Firmicutes|c__Bacilli|o__Bacillales|f__Planococcaceae|g__Paenisporosarcina	47	2	165	18	0	65	2	16	7	4	3	1
k__Bacteria|p__Proteobacteria|c__Alphaproteobacteria|o__Rhodobacterales|f__Rhodobacteraceae|g__Rubellimicrobium	14	18	57	23	56	126	3	5	0	19	1	6
k__Bacteria|p__Firmicutes|c__Bacilli|o__Bacillales|f__Planococcaceae|g__Solibacillus	21	4	101	114	53	0	2	14	3	4	1	3
k__Bacteria|p__Proteobacteria|c__Betaproteobacteria|o__Neisseriales|f__Neisseriaceae|g__Neisseria	18	3	0	0	259	0	3	23	0	0	8	0
k__Bacteria|p__Actinobacteria|c__Actinobacteria|o__Actinomycetales|f__Sporichthyaceae|g__	3	5	19	74	51	117	1	5	6	18	3	3
k__Bacteria|p__Proteobacteria|c__Alphaproteobacteria|o__Rhizobiales|f__Methylobacteriaceae|g__	1	0	4	70	0	203	0	0	0	9	11	4
k__Bacteria|p__Firmicutes|c__Bacilli|o__Bacillales|f__Planococcaceae|g__Planococcus	8	5	50	92	10	0	3	6	1	43	34	30
k__Bacteria|p__Firmicutes|c__Bacilli|o__Bacillales|f__Bacillaceae|g__Anoxybacillus	0	1	27	61	178	0	0	0	0	4	7	1
k__Bacteria|p__Proteobacteria|c__Betaproteobacteria|o__Burkholderiales|f__Comamonadaceae|g__Schlegelella	0	0	58	0	0	220	0	0	0	0	1	0
k__Bacteria|p__Bacteroidetes|c__[Saprospirae]|o__[Saprospirales]|f__Chitinophagaceae|g__Chitinophaga	1	13	67	0	0	0	3	81	1	61	36	15
k__Bacteria|p__Actinobacteria|c__Actinobacteria|o__Actinomycetales|f__Actinomycetaceae|g__	0	5	8	0	242	0	0	16	0	0	2	0
k__Bacteria|p__Firmicutes|c__Bacilli|o__Lactobacillales|f__Carnobacteriaceae|g__Granulicatella	1	2	0	72	188	0	0	1	0	0	9	0
k__Bacteria|p__Actinobacteria|c__Actinobacteria|o__Actinomycetales|f__Dermabacteraceae|g__Dermabacter	0	3	1	0	256	0	0	0	1	0	0	1
k__Bacteria|p__Actinobacteria|c__Thermoleophilia|o__Solirubrobacterales|f__|g__	6	4	19	22	0	0	20	114	20	32	13	12
k__Bacteria|p__Firmicutes|c__Bacilli|o__Bacillales|f__Planococcaceae|g__Rummeliibacillus	2	3	7	50	175	0	1	0	0	10	6	8
k__Bacteria|p__Actinobacteria|c__Acidimicrobiia|o__Acidimicrobiales|f__|g__	6	3	8	41	0	83	3	24	2	35	42	13
k__Bacteria|p__Proteobacteria|c__Gammaproteobacteria|o__Pseudomonadales|f__Moraxellaceae|g__Enhydrobacter	4	3	5	74	147	0	1	17	0	2	3	0
k__Bacteria|p__Proteobacteria|c__Alphaproteobacteria|o__Rhizobiales|f__Rhizobiaceae|g__Rhizobium	2	3	12	15	0	0	22	95	10	40	35	20
k__Bacteria|p__Proteobacteria|c__Betaproteobacteria|o__Rhodocyclales|f__Rhodocyclaceae|g__	28	6	39	10	75	0	4	26	4	18	28	15
k__Bacteria|p__Proteobacteria|c__Betaproteobacteria|o__Neisseriales|f__Neisseriaceae|g__Vogesella	0	12	0	0	232	0	0	0	0	0	1	0
k__Bacteria|p__Bacteroidetes|c__Bacteroidia|o__Bacteroidales|f__Prevotellaceae|g__Prevotella	9	5	0	217	0	4	3	0	1	5	0	0
k__Bacteria|p__Firmicutes|c__Clostridia|o__Clostridiales|f__Lachnospiraceae|g__	22	0	9	0	82	94	0	0	1	28	3	4
k__Bacteria|p__Actinobacteria|c__Actinobacteria|o__Actinomycetales|f__Micromonosporaceae|g__Pilimelia	0	0	20	65	0	51	3	22	1	41	13	23
k__Bacteria|p__Actinobacteria|c__Actinobacteria|o__Actinomycetales|f__Micrococcaceae|g__Microbispora	3	2	65	136	0	0	17	5	2	0	0	3
k__Bacteria|p__Firmicutes|c__Bacilli|o__Lactobacillales|f__Carnobacteriaceae|g__Carnobacterium	31	3	130	0	0	0	6	54	3	0	4	0
k__Bacteria|p__Proteobacteria|c__Alphaproteobacteria|o__Caulobacterales|f__Caulobacteraceae|g__Mycoplana	0	5	12	25	1	130	2	4	2	28	14	7
k__Bacteria|p__Firmicutes|c__Bacilli|o__Turicibacterales|f__Turicibacteraceae|g__Turicibacter	8	2	37	172	1	0	0	3	0	0	0	1
k__Bacteria|p__Proteobacteria|c__Betaproteobacteria|o__|f__|g__	0	1	34	0	60	0	12	50	11	27	15	11
k__Bacteria|p__Proteobacteria|c__Betaproteobacteria|o__Burkholderiales|f__Comamonadaceae|g__Hylemonella	0	1	3	34	181	0	1	0	0	1	0	0
k__Bacteria|p__Proteobacteria|c__Gammaproteobacteria|o__Pasteurellales|f__Pasteurellaceae|g__Aggregatibacter	0	0	0	0	160	0	0	0	0	0	55	0
k__Bacteria|p__Firmicutes|c__Bacilli|o__Bacillales|f__[Exiguobacteraceae]|g__Exiguobacterium	7	1	49	1	0	0	12	108	30	2	4	0
k__Bacteria|p__Bacteroidetes|c__Bacteroidia|o__Bacteroidales|f__[Paraprevotellaceae]|g__[Prevotella]	8	16	0	21	14	1	0	73	0	1	77	1
k__Bacteria|p__Proteobacteria|c__Alphaproteobacteria|o__Sphingomonadales|f__Sphingomonadaceae|g__	4	7	23	20	2	31	2	45	5	31	22	20
k__Bacteria|p__Proteobacteria|c__Alphaproteobacteria|o__Rhizobiales|f__Bradyrhizobiaceae|g__	1	7	13	62	5	7	6	41	7	21	27	12
k__Bacteria|p__Proteobacteria|c__Gammaproteobacteria|o__Enterobacteriales|f__Enterobacteriaceae|g__Morganella	13	14	48	1	0	0	7	98	12	6	6	0
k__Bacteria|p__Proteobacteria|c__Betaproteobacteria|o__Burkholderiales|f__Alcaligenaceae|g__	5	29	48	69	1	0	3	16	2	15	7	4
k__Bacteria|p__Firmicutes|c__Bacilli|o__Lactobacillales|f__Aerococcaceae|g__	0	2	36	74	71	7	0	2	1	0	3	1
k__Bacteria|p__Actinobacteria|c__Actinobacteria|o__Actinomycetales|f__Microbacteriaceae|g__Frigoribacterium	2	0	0	0	0	0	2	8	1	95	61	26
k__Bacteria|p__Bacteroidetes|c__Cytophagia|o__Cytophagales|f__Cytophagaceae|g__	0	4	7	76	0	0	2	24	3	36	21	15
k__Bacteria|p__Chloroflexi|c__Thermomicrobia|o__JG30-KF-CM45|f__|g__	1	2	13	0	0	0	6	6	4	60	69	25
k__Bacteria|p__Proteobacteria|c__Betaproteobacteria|o__Rhodocyclales|f__Rhodocyclaceae|g__Dok59	0	6	0	0	178	0	1	0	0	0	0	0
k__Bacteria|p__Proteobacteria|c__Gammaproteobacteria|o__Oceanospirillales|f__Oceanospirillaceae|g__Marinobacterium	6	0	7	167	0	0	0	2	0	0	0	2
k__Bacteria|p__Chloroflexi|c__Chloroflexi|o__[Roseiflexales]|f__[Kouleothrixaceae]|g__	0	0	5	0	0	0	16	102	11	18	21	10
k__Bacteria|p__Actinobacteria|c__Actinobacteria|o__Actinomycetales|f__Intrasporangiaceae|g__	5	0	15	131	0	0	7	10	9	0	3	2
k__Bacteria|p__Firmicutes|c__Clostridia|o__Clostridiales|f__Peptococcaceae|g__Desulfosporosinus	3	4	23	2	0	81	2	5	0	33	5	24
k__Bacteria|p__Proteobacteria|c__Alphaproteobacteria|o__Rhodobacterales|f__Rhodobacteraceae|g__	4	40	15	56	0	49	2	12	1	2	0	1
k__Bacteria|p__Firmicutes|c__Bacilli|o__Bacillales|f__Planococcaceae|g__Kurthia	37	14	127	1	1	0	0	1	0	0	0	0
k__Bacteria|p__Proteobacteria|c__Alphaproteobacteria|o__Rhizobiales|f__Rhizobiaceae|g__Kaistia	0	0	1	41	0	0	4	11	3	44	54	17
k__Bacteria|p__Proteobacteria|c__Gammaproteobacteria|o__Xanthomonadales|f__Sinobacteraceae|g__	0	0	0	29	0	0	10	49	14	35	26	12
k__Bacteria|p__Firmicutes|c__Bacilli|o__Bacillales|f__Thermoactinomycetaceae|g__Planifilum	3	0	75	60	0	0	0	0	0	25	2	9
k__Bacteria|p__Actinobacteria|c__Thermoleophilia|o__Solirubrobacterales|f__Solirubrobacteraceae|g__	9	0	8	36	0	0	9	27	6	31	34	12
k__Bacteria|p__Proteobacteria|c__Alphaproteobacteria|o__Rhizobiales|f__Hyphomicrobiaceae|g__Rhodoplanes	2	1	7	47	0	0	1	23	4	23	40	18
k__Bacteria|p__Proteobacteria|c__Gammaproteobacteria|o__Xanthomonadales|f__Xanthomonadaceae|g__Pseudoxanthomonas	0	0	0	0	0	0	2	4	1	64	61	31
k__Bacteria|p__Bacteroidetes|c__Cytophagia|o__Cytophagales|f__|g__	37	40	85	0	0	0	0	0	0	0	0	0
k__Bacteria|p__Bacteroidetes|c__Flavobacteriia|o__Flavobacteriales|f__[Weeksellaceae]|g__Cloacibacterium	0	7	0	0	155	0	0	0	0	0	0	0
k__Bacteria|p__Firmicutes|c__Bacilli|o__Bacillales|f__Alicyclobacillaceae|g__	2	0	1	0	0	147	0	0	0	3	5	4
k__Bacteria|p__Proteobacteria|c__Alphaproteobacteria|o__Rhizobiales|f__Brucellaceae|g__Ochrobactrum	0	0	0	0	0	0	0	0	0	48	64	43
k__Bacteria|p__Actinobacteria|c__Actinobacteria|o__Actinomycetales|f__Microbacteriaceae|g__Pseudoclavibacter	0	3	10	0	117	0	4	1	2	8	4	0
k__Bacteria|p__Proteobacteria|c__Alphaproteobacteria|o__Rhodobacterales|f__Rhodobacteraceae|g__Amaricoccus	7	12	32	24	0	0	1	14	3	23	17	13
k__Bacteria|p__Actinobacteria|c__Actinobacteria|o__Actinomycetales|f__Microbacteriaceae|g__Salinibacterium	23	4	15	1	0	0	7	45	7	27	11	5
k__Bacteria|p__Proteobacteria|c__Deltaproteobacteria|o__Myxococcales|f__OM27|g__	16	4	88	0	0	0	0	0	0	16	13	6
k__Bacteria|p__Firmicutes|c__Bacilli|o__Bacillales|f__Bacillaceae|g__Virgibacillus	14	2	37	0	0	0	0	1	0	44	25	16
k__Bacteria|p__Proteobacteria|c__Alphaproteobacteria|o__Caulobacterales|f__Caulobacteraceae|g__Phenylobacterium	6	1	24	1	1	0	2	4	2	30	44	20
k__Bacteria|p__Firmicutes|c__Clostridia|o__Clostridiales|f__[Tissierellaceae]|g__Peptoniphilus	16	0	0	81	0	0	2	34	0	0	0	0
k__Bacteria|p__Firmicutes|c__Bacilli|o__Bacillales|f__Planococcaceae|g__Planomicrobium	16	5	57	34	0	0	3	12	1	3	0	0
k__Bacteria|p__Firmicutes|c__Clostridia|o__Clostridiales|f__|g__	1	11	61	41	0	0	4	1	5	4	0	2
k__Bacteria|p__Proteobacteria|c__Alphaproteobacteria|o__Rhizobiales|f__Methylocystaceae|g__	0	0	4	31	56	0	1	9	3	9	9	6
k__Bacteria|p__Firmicutes|c__Clostridia|o__Clostridiales|f__Lachnospiraceae|g__Epulopiscium	7	6	53	33	0	0	5	22	1	0	0	0
k__Bacteria|p__Proteobacteria|c__Gammaproteobacteria|o__Xanthomonadales|f__Xanthomonadaceae|g__Dokdonella	0	0	0	0	0	0	8	15	10	29	38	27
k__Bacteria|p__Actinobacteria|c__Actinobacteria|o__Actinomycetales|f__Pseudonocardiaceae|g__Actinomycetospora	1	0	0	124	0	0	0	0	0	0	0	0
k__Bacteria|p__Proteobacteria|c__Alphaproteobacteria|o__Rhodospirillales|f__Rhodospirillaceae|g__	2	0	3	0	0	0	13	10	7	41	25	22
k__Bacteria|p__Actinobacteria|c__Actinobacteria|o__Actinomycetales|f__Sanguibacteraceae|g__Sanguibacter	0	1	0	0	0	0	0	15	2	38	39	26
k__Bacteria|p__Proteobacteria|c__Alphaproteobacteria|o__Caulobacterales|f__Caulobacteraceae|g__Asticcacaulis	1	2	23	0	0	0	2	24	3	13	33	20
k__Bacteria|p__Firmicutes|c__Clostridia|o__Clostridiales|f__[Tissierellaceae]|g__Tissierella_Soehngenia	0	4	42	60	0	0	2	0	0	4	8	0
k__Bacteria|p__Actinobacteria|c__Actinobacteria|o__Actinomycetales|f__Micrococcaceae|g__Renibacterium	1	0	0	49	67	0	0	0	0	0	1	0
k__Bacteria|p__Proteobacteria|c__Betaproteobacteria|o__Burkholderiales|f__Comamonadaceae|g__Methylibium	23	0	31	0	0	0	6	27	16	3	9	2
k__Bacteria|p__Proteobacteria|c__Gammaproteobacteria|o__Enterobacteriales|f__Enterobacteriaceae|g__Enterobacter	0	0	0	0	0	0	2	89	11	11	1	3
k__Bacteria|p__Fusobacteria|c__Fusobacteriia|o__Fusobacteriales|f__Fusobacteriaceae|g__Fusobacterium	1	5	0	64	0	0	1	0	0	4	41	0
k__Bacteria|p__Proteobacteria|c__Betaproteobacteria|o__Burkholderiales|f__Comamonadaceae|g__Limnohabitans	2	0	1	3	102	0	0	0	3	2	3	0
k__Bacteria|p__Firmicutes|c__Clostridia|o__Clostridiales|f__[Tissierellaceae]|g__Sedimentibacter	0	0	82	0	28	0	0	0	2	1	0	2
k__Bacteria|p__Actinobacteria|c__Actinobacteria|o__Actinomycetales|f__Microbacteriaceae|g__Leucobacter	0	0	0	0	0	0	0	0	1	48	45	19
k__Bacteria|p__Proteobacteria|c__Deltaproteobacteria|o__Myxococcales|f__|g__	6	9	34	0	0	0	4	23	4	11	14	7
k__Bacteria|p__Bacteroidetes|c__Sphingobacteriia|o__Sphingobacteriales|f__Sphingobacteriaceae|g__Olivibacter	0	0	0	0	0	0	0	0	0	46	44	21
k__Bacteria|p__Firmicutes|c__Clostridia|o__Clostridiales|f__[Tissierellaceae]|g__	2	8	20	76	0	0	0	0	0	0	2	1
k__Bacteria|p__Proteobacteria|c__Alphaproteobacteria|o__Caulobacterales|f__Caulobacteraceae|g__Caulobacter	1	0	20	0	0	0	5	32	3	21	15	12
k__Bacteria|p__Actinobacteria|c__Actinobacteria|o__Actinomycetales|f__Microbacteriaceae|g__Herbiconiux	0	2	24	0	0	0	8	22	7	6	22	16
k__Bacteria|p__Bacteroidetes|c__Flavobacteriia|o__Flavobacteriales|f__[Weeksellaceae]|g__	0	9	6	1	77	0	1	0	1	0	12	0
k__Bacteria|p__Actinobacteria|c__Acidimicrobiia|o__Acidimicrobiales|f__C111|g__	0	0	39	0	0	0	7	19	7	16	11	7
k__Bacteria|p__Firmicutes|c__Clostridia|o__Clostridiales|f__Peptostreptococcaceae|g__Tepidibacter	7	0	15	80	0	0	1	0	0	0	0	3
k__Bacteria|p__Proteobacteria|c__Alphaproteobacteria|o__Rhodospirillales|f__Acetobacteraceae|g__	4	12	6	15	3	0	3	6	5	20	19	13
k__Bacteria|p__Actinobacteria|c__Actinobacteria|o__Actinomycetales|f__Nocardioidaceae|g__Nocardioides	0	0	22	0	3	0	10	53	5	5	5	2
k__Bacteria|p__Actinobacteria|c__Actinobacteria|o__Actinomycetales|f__Micromonosporaceae|g__Virgisporangium	0	0	0	0	0	0	9	40	5	21	15	10
k__Bacteria|p__Bacteroidetes|c__Flavobacteriia|o__Flavobacteriales|f__Flavobacteriaceae|g__Capnocytophaga	0	2	0	79	0	0	0	16	0	0	2	0
k__Bacteria|p__Proteobacteria|c__Gammaproteobacteria|o__Enterobacteriales|f__Enterobacteriaceae|g__Ewingella	0	0	0	0	0	0	45	23	31	0	0	0
k__Bacteria|p__TM7|c__TM7-3|o__EW055|f__|g__	2	1	0	0	0	0	11	22	5	31	14	12
k__Bacteria|p__Firmicutes|c__Bacilli|o__Bacillales|f__Planococcaceae|g__Ureibacillus	8	9	32	23	0	0	0	0	0	6	13	6
k__Bacteria|p__Proteobacteria|c__Betaproteobacteria|o__Burkholderiales|f__Comamonadaceae|g__Tepidimonas	0	0	9	44	0	43	0	0	0	0	0	0
k__Bacteria|p__Planctomycetes|c__Planctomycetia|o__Gemmatales|f__Isosphaeraceae|g__	0	1	2	0	0	0	6	3	13	27	30	13
k__Bacteria|p__Proteobacteria|c__Betaproteobacteria|o__Methylophilales|f__Methylophilaceae|g__Methylotenera	7	2	13	54	0	0	2	4	0	7	4	0
k__Bacteria|p__Firmicutes|c__Clostridia|o__Clostridiales|f__[Tissierellaceae]|g__Finegoldia	1	2	0	1	62	0	0	26	0	0	0	0
k__Bacteria|p__Proteobacteria|c__Betaproteobacteria|o__Burkholderiales|f__|g__	0	20	5	0	3	1	3	35	4	7	11	2
k__Bacteria|p__Proteobacteria|c__Alphaproteobacteria|o__Sphingomonadales|f__Sphingomonadaceae|g__Sphingopyxis	0	0	0	29	19	35	0	0	1	3	3	0
k__Bacteria|p__Proteobacteria|c__Gammaproteobacteria|o__Xanthomonadales|f__Xanthomonadaceae|g__Thermomonas	0	0	0	84	0	0	1	0	0	1	0	1
k__Bacteria|p__Proteobacteria|c__Alphaproteobacteria|o__Rhodospirillales|f__Rhodospirillaceae|g__Skermanella	0	0	0	61	0	0	2	18	2	2	1	0
k__Bacteria|p__Firmicutes|c__Bacilli|o__Lactobacillales|f__Carnobacteriaceae|g__Trichococcus	0	0	8	0	0	0	17	45	13	0	0	2
k__Bacteria|p__Tenericutes|c__Mollicutes|o__|f__|g__	2	0	82	0	0	0	0	0	1	0	0	0
k__Bacteria|p__Bacteroidetes|c__Bacteroidia|o__Bacteroidales|f__Porphyromonadaceae|g__Porphyromonas	7	0	0	0	24	0	0	0	0	0	53	0
k__Bacteria|p__Actinobacteria|c__Actinobacteria|o__Actinomycetales|f__Kineosporiaceae|g__	11	0	0	0	0	0	3	37	4	6	15	7
k__Bacteria|p__[Thermi]|c__Deinococci|o__Deinococcales|f__Deinococcaceae|g__Deinococcus	0	2	0	55	8	0	0	13	0	0	1	4
k__Bacteria|p__Actinobacteria|c__Actinobacteria|o__Actinomycetales|f__Dermabacteraceae|g__	0	0	0	80	0	0	0	0	0	0	0	0
k__Archaea|p__Euryarchaeota|c__Methanomicrobia|o__Methanocellales|f__Methanocellaceae|g__Methanocella	0	0	0	0	0	0	0	0	1	34	27	16
k__Bacteria|p__Firmicutes|c__Bacilli|o__Bacillales|f__Bacillaceae|g__Geobacillus	4	5	23	0	0	0	0	0	0	21	15	10
k__Bacteria|p__Fusobacteria|c__Fusobacteriia|o__Fusobacteriales|f__Leptotrichiaceae|g__Leptotrichia	0	0	0	34	0	0	0	38	0	0	6	0
k__Bacteria|p__Actinobacteria|c__Thermoleophilia|o__Solirubrobacterales|f__Patulibacteraceae|g__	10	2	0	0	0	28	9	12	7	7	0	2
k__Bacteria|p__Chloroflexi|c__TK10|o__AKYG885|f__Dolo_23|g__	8	0	10	0	0	0	6	32	9	2	6	3
k__Bacteria|p__Actinobacteria|c__Actinobacteria|o__Actinomycetales|f__Micromonosporaceae|g__Catenuloplanes	0	0	6	0	67	0	0	0	0	0	2	0
k__Bacteria|p__Bacteroidetes|c__[Saprospirae]|o__[Saprospirales]|f__Saprospiraceae|g__	0	0	0	0	74	0	0	0	0	1	0	0
k__Bacteria|p__Proteobacteria|c__Alphaproteobacteria|o__Rhodospirillales|f__Rhodospirillaceae|g__Inquilinus	0	0	0	31	0	0	1	36	1	2	3	1
k__Bacteria|p__Bacteroidetes|c__Cytophagia|o__Cytophagales|f__Cytophagaceae|g__Adhaeribacter	0	3	9	0	0	54	0	0	0	5	2	1
k__Bacteria|p__Firmicutes|c__Bacilli|o__Lactobacillales|f__Aerococcaceae|g__Alloiococcus	13	0	0	60	0	0	1	0	0	0	0	0
k__Bacteria|p__Proteobacteria|c__Betaproteobacteria|o__Neisseriales|f__Neisseriaceae|g__Aquitalea	0	0	0	0	72	0	0	0	0	1	1	0
k__Bacteria|p__Planctomycetes|c__Planctomycetia|o__Pirellulales|f__Pirellulaceae|g__	4	4	3	0	0	0	2	0	1	20	29	9
k__Bacteria|p__Proteobacteria|c__Alphaproteobacteria|o__Sphingomonadales|f__Erythrobacteraceae|g__	2	5	5	27	0	0	4	5	4	11	5	4
k__Bacteria|p__Proteobacteria|c__Betaproteobacteria|o__Burkholderiales|f__Comamonadaceae|g__Ramlibacter	5	0	7	0	1	0	3	0	1	20	18	17
k__Bacteria|p__Acidobacteria|c__Sva0725|o__Sva0725|f__|g__	2	0	6	0	0	0	9	33	5	2	8	6
k__Bacteria|p__Actinobacteria|c__Actinobacteria|o__Actinomycetales|f__Microbacteriaceae|g__Rathayibacter	21	7	26	0	0	0	1	7	5	3	0	0
k__Bacteria|p__Firmicutes|c__Clostridia|o__Clostridiales|f__Clostridiaceae|g__Caloramator	2	0	4	0	0	0	0	0	0	26	19	19
k__Bacteria|p__FBP|c__|o__|f__|g__	6	0	29	0	0	0	2	4	2	11	7	8
k__Bacteria|p__Firmicutes|c__Bacilli|o__Lactobacillales|f__Streptococcaceae|g__	0	1	0	2	66	0	0	0	0	0	0	0
k__Bacteria|p__Armatimonadetes|c__[Fimbriimonadia]|o__[Fimbriimonadales]|f__[Fimbriimonadaceae]|g__Fimbriimonas	0	0	2	0	0	0	4	17	5	22	15	3
k__Bacteria|p__Firmicutes|c__Bacilli|o__Lactobacillales|f__Aerococcaceae|g__Aerococcus	0	0	0	67	0	0	0	0	0	0	0	0
k__Bacteria|p__Acidobacteria|c__Solibacteres|o__Solibacterales|f__|g__	3	0	10	0	0	0	0	14	2	10	19	8
k__Bacteria|p__Actinobacteria|c__Actinobacteria|o__Actinomycetales|f__Dermacoccaceae|g__Dermacoccus	0	4	0	62	0	0	0	0	0	0	0	0
k__Bacteria|p__Firmicutes|c__Bacilli|o__Bacillales|f__[Exiguobacteraceae]|g__	0	1	0	64	0	0	1	0	0	0	0	0
k__Bacteria|p__Actinobacteria|c__Actinobacteria|o__Actinomycetales|f__Pseudonocardiaceae|g__	0	0	0	2	49	0	1	0	2	1	8	2
k__Bacteria|p__Proteobacteria|c__Alphaproteobacteria|o__Rhodobacterales|f__Rhodobacteraceae|g__Ruegeria	6	0	0	59	0	0	0	0	0	0	0	0
k__Bacteria|p__Proteobacteria|c__Gammaproteobacteria|o__Xanthomonadales|f__Xanthomonadaceae|g__Luteibacter	0	3	0	0	0	0	6	23	2	15	10	5
k__Bacteria|p__Proteobacteria|c__Alphaproteobacteria|o__Rhodospirillales|f__|g__	3	3	13	0	0	0	0	21	4	2	15	2
k__Bacteria|p__Firmicutes|c__Bacilli|o__Bacillales|f__Planococcaceae|g__Lysinibacillus	2	10	6	0	0	0	0	0	0	22	11	11
k__Bacteria|p__Proteobacteria|c__Betaproteobacteria|o__Burkholderiales|f__Alcaligenaceae|g__Achromobacter	0	0	1	0	0	0	1	1	1	10	33	15
k__Bacteria|p__TM7|c__TM7-1|o__|f__|g__	0	0	0	0	0	0	2	12	6	22	15	4
k__Bacteria|p__Firmicutes|c__Clostridia|o__Clostridiales|f__Lachnospiraceae|g__Blautia	0	0	1	0	58	0	1	0	0	0	0	0
k__Bacteria|p__Acidobacteria|c__Acidobacteriia|o__Acidobacteriales|f__Acidobacteriaceae|g__Terriglobus	0	0	1	0	0	0	8	46	1	0	2	1
k__Bacteria|p__Actinobacteria|c__Actinobacteria|o__Actinomycetales|f__Intrasporangiaceae|g__Arsenicicoccus	0	0	8	48	0	0	0	3	0	0	0	0
k__Bacteria|p__Actinobacteria|c__Actinobacteria|o__Actinomycetales|f__Intrasporangiaceae|g__Phycicoccus	0	0	9	0	0	0	4	26	9	3	7	1
k__Bacteria|p__Firmicutes|c__Bacilli|o__Bacillales|f__Thermoactinomycetaceae|g__Laceyella	5	0	11	40	0	0	0	0	1	2	0	0
k__Bacteria|p__Gemmatimonadetes|c__Gemm-3|o__|f__|g__	0	12	19	0	0	0	2	3	1	12	8	2
k__Bacteria|p__Actinobacteria|c__Thermoleophilia|o__Gaiellales|f__|g__	5	0	18	0	0	0	6	20	3	0	3	3
k__Bacteria|p__Proteobacteria|c__Betaproteobacteria|o__Burkholderiales|f__Burkholderiaceae|g__	0	2	0	0	0	0	6	43	3	0	2	2
k__Bacteria|p__Actinobacteria|c__Actinobacteria|o__Actinomycetales|f__Streptosporangiaceae|g__Nonomuraea	0	0	1	15	0	0	0	17	1	15	4	4
k__Bacteria|p__Armatimonadetes|c__Armatimonadia|o__FW68|f__|g__	0	0	0	0	0	0	6	35	2	8	1	5
k__Bacteria|p__Firmicutes|c__Bacilli|o__Bacillales|f__Paenibacillaceae|g__Thermobacillus	0	0	0	55	0	0	0	0	0	0	2	0
k__Bacteria|p__Proteobacteria|c__Alphaproteobacteria|o__Ellin329|f__|g__	0	1	0	15	0	0	2	27	2	6	4	0
k__Bacteria|p__Actinobacteria|c__Actinobacteria|o__Actinomycetales|f__Beutenbergiaceae|g__Salana	0	0	0	0	0	0	2	0	1	14	32	7
k__Bacteria|p__Proteobacteria|c__Alphaproteobacteria|o__Rhizobiales|f__Phyllobacteriaceae|g__	0	0	0	22	0	0	0	2	1	9	15	7
k__Bacteria|p__Actinobacteria|c__Actinobacteria|o__Actinomycetales|f__Nocardioidaceae|g__Friedmanniella	3	0	4	20	22	0	0	0	1	1	2	0
k__Bacteria|p__Actinobacteria|c__Actinobacteria|o__Actinomycetales|f__Propionibacteriaceae|g__Microlunatus	0	1	0	1	48	0	2	0	0	0	0	1
k__Bacteria|p__Actinobacteria|c__Actinobacteria|o__Actinomycetales|f__Cryptosporangiaceae|g__Cryptosporangium	5	0	0	0	0	0	0	14	3	17	2	10
k__Bacteria|p__Proteobacteria|c__Deltaproteobacteria|o__MIZ46|f__|g__	4	0	0	0	0	0	2	20	3	0	17	4
k__Bacteria|p__Actinobacteria|c__Actinobacteria|o__Actinomycetales|f__Dietziaceae|g__Dietzia	10	0	6	27	0	0	0	6	0	0	0	0
k__Bacteria|p__Chloroflexi|c__Chloroflexi|o__AKIW781|f__|g__	0	0	0	0	0	0	0	4	1	23	14	7
k__Bacteria|p__Actinobacteria|c__Actinobacteria|o__Actinomycetales|f__Intrasporangiaceae|g__Terracoccus	0	0	13	0	0	0	5	20	4	1	4	0
k__Bacteria|p__Actinobacteria|c__Actinobacteria|o__Actinomycetales|f__Thermomonosporaceae|g__Actinomadura	4	0	7	31	0	0	0	0	0	4	0	1
k__Bacteria|p__Proteobacteria|c__Gammaproteobacteria|o__Pasteurellales|f__Pasteurellaceae|g__Actinobacillus	0	4	0	37	0	0	0	0	0	1	5	0
k__Bacteria|p__Actinobacteria|c__Thermoleophilia|o__Solirubrobacterales|f__Solirubrobacteraceae|g__Solirubrobacter	0	0	8	0	0	0	9	5	8	6	7	2
k__Bacteria|p__Bacteroidetes|c__[Saprospirae]|o__[Saprospirales]|f__Chitinophagaceae|g__Niastella	0	0	0	0	0	0	0	5	0	13	17	10
k__Bacteria|p__Proteobacteria|c__Deltaproteobacteria|o__Myxococcales|f__Haliangiaceae|g__	1	0	8	0	0	0	1	4	2	14	8	7
k__Bacteria|p__Proteobacteria|c__Gammaproteobacteria|o__Enterobacteriales|f__Enterobacteriaceae|g__Gluconacetobacter	0	0	1	0	3	0	18	7	14	1	1	0
k__Bacteria|p__Actinobacteria|c__Actinobacteria|o__Actinomycetales|f__Microbacteriaceae|g__Yonghaparkia	0	39	5	0	0	0	0	0	0	0	0	0
k__Bacteria|p__Actinobacteria|c__Actinobacteria|o__Actinomycetales|f__Micromonosporaceae|g__Phytohabitans	1	0	3	0	0	0	0	11	3	15	3	8
k__Bacteria|p__Firmicutes|c__Bacilli|o__Bacillales|f__Staphylococcaceae|g__Macrococcus	5	9	28	0	0	0	0	0	2	0	0	0
k__Bacteria|p__Proteobacteria|c__Betaproteobacteria|o__Burkholderiales|f__Comamonadaceae|g__Leptothrix	0	2	15	1	2	3	0	1	6	1	7	6
k__Bacteria|p__Actinobacteria|c__Actinobacteria|o__Actinomycetales|f__Micromonosporaceae|g__Catellatospora	1	0	11	0	0	0	3	20	0	4	3	1
k__Bacteria|p__Chloroflexi|c__Chloroflexi|o__[Roseiflexales]|f__|g__	4	6	12	0	0	0	7	8	1	1	0	3
k__Bacteria|p__Firmicutes|c__Bacilli|o__Bacillales|f__Sporolactobacillaceae|g__Tuberibacillus	0	0	0	0	0	0	2	0	0	8	12	20
k__Bacteria|p__Proteobacteria|c__Betaproteobacteria|o__Methylophilales|f__Methylophilaceae|g__	0	0	0	0	0	0	5	3	0	18	13	2
k__Bacteria|p__Actinobacteria|c__Actinobacteria|o__Actinomycetales|f__Kineosporiaceae|g__Kineococcus	0	0	4	36	0	0	0	0	0	0	0	0
k__Bacteria|p__Actinobacteria|c__Actinobacteria|o__Actinomycetales|f__Williamsiaceae|g__Williamsia	0	1	0	0	0	0	2	16	0	13	4	4
k__Bacteria|p__Actinobacteria|c__Rubrobacteria|o__Rubrobacterales|f__Rubrobacteraceae|g__Rubrobacter	0	0	0	40	0	0	0	0	0	0	0	0
k__Bacteria|p__Proteobacteria|c__Alphaproteobacteria|o__Rhizobiales|f__Phyllobacteriaceae|g__Mesorhizobium	0	1	2	0	0	0	5	3	3	12	9	5
k__Bacteria|p__Proteobacteria|c__Gammaproteobacteria|o__Enterobacteriales|f__Enterobacteriaceae|g__Plesiomonas	6	3	1	0	0	0	10	14	6	0	0	0
k__Bacteria|p__Firmicutes|c__Clostridia|o__Clostridiales|f__Veillonellaceae|g__	1	3	3	0	0	0	0	1	0	11	11	9
k__Bacteria|p__Actinobacteria|c__Actinobacteria|o__Actinomycetales|f__Frankiaceae|g__	2	0	0	29	0	0	2	0	2	1	0	2
k__Bacteria|p__Actinobacteria|c__Actinobacteria|o__Actinomycetales|f__Nocardiaceae|g__Nocardia	0	0	0	38	0	0	0	0	0	0	0	0
k__Bacteria|p__Actinobacteria|c__Actinobacteria|o__Actinomycetales|f__Propionibacteriaceae|g__	0	6	21	0	0	0	2	3	1	1	3	1
k__Bacteria|p__Proteobacteria|c__Alphaproteobacteria|o__Rhizobiales|f__Hyphomicrobiaceae|g__Hyphomicrobium	0	4	3	8	0	0	1	2	2	7	0	11
k__Bacteria|p__Proteobacteria|c__Alphaproteobacteria|o__Rhodospirillales|f__Acetobacteraceae|g__Roseococcus	0	0	0	0	0	0	1	8	0	12	11	6
k__Bacteria|p__Proteobacteria|c__Betaproteobacteria|o__Rhodocyclales|f__Rhodocyclaceae|g__Petrobacter	0	0	0	38	0	0	0	0	0	0	0	0
k__Bacteria|p__Bacteroidetes|c__Cytophagia|o__Cytophagales|f__Flammeovirgaceae|g__	0	15	10	12	0	0	0	0	0	0	0	0
k__Bacteria|p__Bacteroidetes|c__[Saprospirae]|o__[Saprospirales]|f__Chitinophagaceae|g__Filimonas	0	0	0	0	0	0	2	16	2	5	8	4
k__Bacteria|p__Firmicutes|c__Clostridia|o__Clostridiales|f__[Mogibacteriaceae]|g__Mogibacterium	0	0	0	37	0	0	0	0	0	0	0	0
k__Bacteria|p__Proteobacteria|c__Alphaproteobacteria|o__Rhizobiales|f__Aurantimonadaceae|g__	1	0	0	3	32	0	1	0	0	0	0	0
k__Bacteria|p__Proteobacteria|c__Betaproteobacteria|o__Nitrosomonadales|f__Nitrosomonadaceae|g__Nitrosovibrio	0	0	37	0	0	0	0	0	0	0	0	0
k__Bacteria|p__Firmicutes|c__Clostridia|o__Clostridiales|f__Christensenellaceae|g__	0	0	16	0	0	0	0	5	2	5	6	2
k__Bacteria|p__Actinobacteria|c__Actinobacteria|o__Actinomycetales|f__Micromonosporaceae|g__Dactylosporangium	0	3	0	0	0	0	0	25	1	0	1	5
k__Bacteria|p__Firmicutes|c__Clostridia|o__Clostridiales|f__Symbiobacteriaceae|g__Symbiobacterium	0	0	0	24	0	0	2	0	1	4	3	1
k__Bacteria|p__Actinobacteria|c__Thermoleophilia|o__Solirubrobacterales|f__Conexibacteraceae|g__	0	0	0	0	0	0	2	7	1	7	11	6
k__Bacteria|p__Firmicutes|c__Clostridia|o__Clostridiales|f__Ruminococcaceae|g__Ruminococcus	11	1	17	0	0	0	2	0	0	0	2	1
k__Bacteria|p__Actinobacteria|c__Actinobacteria|o__Actinomycetales|f__Cellulomonadaceae|g__Demequina	0	0	0	0	0	0	1	0	0	16	14	2
k__Bacteria|p__Actinobacteria|c__Actinobacteria|o__Actinomycetales|f__Microbacteriaceae|g__Agrococcus	0	0	0	21	12	0	0	0	0	0	0	0
k__Bacteria|p__Chloroflexi|c__Anaerolineae|o__Ardenscatenales|f__Ardenscatenaceae|g__Ardenscatena	0	0	8	0	0	0	3	22	0	0	0	0
k__Bacteria|p__Firmicutes|c__Clostridia|o__Clostridiales|f__Ruminococcaceae|g__Oscillospira	8	0	0	25	0	0	0	0	0	0	0	0
k__Bacteria|p__SR1|c__|o__|f__|g__	0	0	0	0	0	0	0	0	0	0	33	0
k__Bacteria|p__Actinobacteria|c__Actinobacteria|o__Actinomycetales|f__Streptosporangiaceae|g__	0	0	0	0	0	0	0	15	0	5	11	1
k__Bacteria|p__Planctomycetes|c__Planctomycetia|o__Gemmatales|f__Gemmataceae|g__Gemmata	0	0	0	0	0	0	6	0	5	4	9	8
k__Bacteria|p__Proteobacteria|c__Alphaproteobacteria|o__|f__|g__	0	0	0	0	1	0	1	21	1	4	2	2
k__Bacteria|p__Proteobacteria|c__Alphaproteobacteria|o__Rhizobiales|f__Hyphomicrobiaceae|g__	0	0	0	0	0	0	0	6	3	16	4	3
k__Bacteria|p__Proteobacteria|c__Alphaproteobacteria|o__Rhizobiales|f__Xanthobacteraceae|g__Ancylobacter	0	0	0	0	0	0	0	9	0	5	11	7
k__Bacteria|p__Actinobacteria|c__Actinobacteria|o__Actinomycetales|f__Streptosporangiaceae|g__Microbispora	0	0	19	0	0	0	0	0	0	4	7	1
k__Bacteria|p__Firmicutes|c__Clostridia|o__OPB54|f__|g__	1	0	0	0	0	1	1	0	0	16	7	5
k__Bacteria|p__Proteobacteria|c__Alphaproteobacteria|o__Sphingomonadales|f__|g__	2	0	0	15	1	3	0	5	1	2	2	0
k__Bacteria|p__Actinobacteria|c__Actinobacteria|o__Actinomycetales|f__Thermomonosporaceae|g__	0	0	0	21	0	0	0	8	0	0	1	0
k__Bacteria|p__Chloroflexi|c__C0119|o__|f__|g__	0	0	0	0	0	0	4	14	3	6	3	0
k__Bacteria|p__Actinobacteria|c__Actinobacteria|o__Actinomycetales|f__Promicromonosporaceae|g__Promicromonospora	0	0	9	0	0	0	5	11	3	0	1	0
k__Bacteria|p__Armatimonadetes|c__Armatimonadia|o__Armatimonadales|f__Armatimonadaceae|g__	0	0	0	0	0	0	5	3	3	6	12	0
k__Bacteria|p__Firmicutes|c__Bacilli|o__Bacillales|f__Thermoactinomycetaceae|g__Thermoactinomyces	5	0	6	0	0	0	0	0	0	11	7	0
k__Bacteria|p__Firmicutes|c__Clostridia|o__Clostridiales|f__Peptococcaceae|g__Peptococcus	0	0	0	29	0	0	0	0	0	0	0	0
k__Bacteria|p__Actinobacteria|c__Actinobacteria|o__Actinomycetales|f__Pseudonocardiaceae|g__Amycolatopsis	0	0	0	0	0	0	0	15	2	10	1	0
k__Bacteria|p__Bacteroidetes|c__Flavobacteriia|o__Flavobacteriales|f__Flavobacteriaceae|g__Myroides	5	23	0	0	0	0	0	0	0	0	0	0
k__Bacteria|p__Firmicutes|c__Clostridia|o__Clostridiales|f__Veillonellaceae|g__Pelosinus	0	0	2	0	0	0	0	0	1	12	5	8
k__Bacteria|p__Bacteroidetes|c__Cytophagia|o__Cytophagales|f__Cytophagaceae|g__Sporocytophaga	0	0	0	0	0	0	0	16	0	10	1	0
k__Bacteria|p__Gemmatimonadetes|c__Gemmatimonadetes|o__|f__|g__	0	0	0	27	0	0	0	0	0	0	0	0
k__Bacteria|p__Firmicutes|c__Bacilli|o__Bacillales|f__Bacillaceae|g__Oceanobacillus	2	0	18	0	0	0	0	0	0	4	0	2
k__Bacteria|p__Firmicutes|c__Bacilli|o__Lactobacillales|f__Leuconostocaceae|g__	0	0	0	0	0	0	4	15	7	0	0	0
k__Bacteria|p__Firmicutes|c__Clostridia|o__|f__|g__	0	0	9	0	0	0	0	0	2	9	3	3
k__Bacteria|p__Planctomycetes|c__Planctomycetia|o__Planctomycetales|f__Planctomycetaceae|g__Planctomyces	0	1	1	0	0	0	2	0	1	4	10	7
k__Bacteria|p__Proteobacteria|c__Betaproteobacteria|o__Burkholderiales|f__Oxalobacteraceae|g__Cupriavidus	0	0	4	0	0	0	0	0	0	12	9	1
k__Bacteria|p__Actinobacteria|c__MB-A2-108|o__0319-7L14|f__|g__	4	0	0	0	0	0	1	15	5	0	0	0
k__Bacteria|p__Actinobacteria|c__Actinobacteria|o__Actinomycetales|f__Nocardioidaceae|g__Pimelobacter	0	7	5	0	0	1	0	9	1	0	0	1
k__Bacteria|p__Actinobacteria|c__Actinobacteria|o__Actinomycetales|f__Thermomonosporaceae|g__Actinocorallia	0	0	4	0	0	0	1	8	4	2	5	0
k__Bacteria|p__Bacteroidetes|c__Bacteroidia|o__Bacteroidales|f__Bacteroidaceae|g__Bacteroides	7	0	0	0	0	0	0	13	1	0	3	0
k__Bacteria|p__Proteobacteria|c__Alphaproteobacteria|o__Rhodospirillales|f__Acetobacteraceae|g__Acidocella	0	0	9	0	0	0	1	12	1	1	0	0
k__Bacteria|p__Proteobacteria|c__Epsilonproteobacteria|o__Campylobacterales|f__Campylobacteraceae|g__Campylobacter	5	0	0	0	0	0	0	13	0	0	6	0
k__Bacteria|p__Verrucomicrobia|c__[Spartobacteria]|o__[Chthoniobacterales]|f__[Chthoniobacteraceae]|g__Candidatus Xiphinematobacter	0	0	0	0	0	0	0	0	1	5	15	3
k__Bacteria|p__Actinobacteria|c__Thermoleophilia|o__Gaiellales|f__AK1AB1_02E|g__	0	0	13	0	0	0	0	0	0	1	7	2
k__Bacteria|p__Bacteroidetes|c__Cytophagia|o__Cytophagales|f__Cytophagaceae|g__Spirosoma	0	0	0	0	0	0	0	15	0	2	6	0
k__Bacteria|p__Firmicutes|c__Bacilli|o__Bacillales|f__Paenibacillaceae|g__Aneurinibacillus	3	0	0	1	0	0	0	4	0	5	9	1
k__Bacteria|p__Firmicutes|c__Clostridia|o__Clostridiales|f__Gracilibacteraceae|g__Gracilibacter	0	0	20	0	0	0	2	0	1	0	0	0
k__Bacteria|p__Proteobacteria|c__Gammaproteobacteria|o__Enterobacteriales|f__Enterobacteriaceae|g__Klebsiella	0	1	7	0	0	0	0	3	0	2	9	1
k__Bacteria|p__Proteobacteria|c__Gammaproteobacteria|o__Xanthomonadales|f__Sinobacteraceae|g__Steroidobacter	0	0	0	0	0	0	0	0	1	8	10	4
k__Bacteria|p__[Thermi]|c__Deinococci|o__Deinococcales|f__Trueperaceae|g__Truepera	4	0	10	0	0	0	0	8	0	1	0	0
k__Bacteria|p__Chloroflexi|c__Anaerolineae|o__SJA-15|f__|g__	0	0	0	0	0	0	2	0	0	8	6	6
k__Bacteria|p__Proteobacteria|c__Alphaproteobacteria|o__Caulobacterales|f__Caulobacteraceae|g__Nitrobacteria	0	0	0	0	0	0	0	0	0	9	11	2
k__Bacteria|p__Proteobacteria|c__Alphaproteobacteria|o__Rhizobiales|f__Beijerinckiaceae|g__Chelatococcus	0	0	0	0	0	0	0	0	0	14	7	1
k__Bacteria|p__Proteobacteria|c__Alphaproteobacteria|o__Rhizobiales|f__Xanthobacteraceae|g__Azorhizobium	0	0	0	0	0	0	0	0	0	8	10	4
k__Bacteria|p__Proteobacteria|c__Deltaproteobacteria|o__NB1-j|f__|g__	0	0	0	0	22	0	0	0	0	0	0	0
k__Bacteria|p__Actinobacteria|c__Actinobacteria|o__Bifidobacteriales|f__Bifidobacteriaceae|g__Gardnerella	0	0	20	0	0	0	1	0	0	0	0	0
k__Bacteria|p__Bacteroidetes|c__[Saprospirae]|o__[Saprospirales]|f__Chitinophagaceae|g__Flavisolibacter	0	2	0	0	0	0	0	10	1	0	3	4
k__Bacteria|p__Proteobacteria|c__Alphaproteobacteria|o__Rhizobiales|f__Xanthobacteraceae|g__Labrys	0	0	0	0	0	0	3	7	5	1	4	0
k__Bacteria|p__Proteobacteria|c__Alphaproteobacteria|o__Rhodospirillales|f__Rhodospirillaceae|g__Azospirillum	0	3	0	0	0	0	2	6	2	3	0	4
k__Bacteria|p__Proteobacteria|c__Deltaproteobacteria|o__Myxococcales|f__Polyangiaceae|g__	0	0	0	0	0	0	0	6	2	7	5	0
k__Bacteria|p__Proteobacteria|c__Gammaproteobacteria|o__Enterobacteriales|f__Enterobacteriaceae|g__Proteus	6	4	10	0	0	0	0	0	0	0	0	0
k__Bacteria|p__Actinobacteria|c__Actinobacteria|o__Actinomycetales|f__Actinospicaceae|g__	0	0	0	0	0	0	1	16	2	0	0	0
k__Bacteria|p__Proteobacteria|c__Alphaproteobacteria|o__Rhizobiales|f__Bradyrhizobiaceae|g__Bradyrhizobium	0	2	0	3	2	4	3	1	2	2	0	0
k__Bacteria|p__Proteobacteria|c__Gammaproteobacteria|o__Xanthomonadales|f__Xanthomonadaceae|g__Rhodanobacter	0	4	0	0	0	0	5	0	8	0	0	1
k__Bacteria|p__TM7|c__TM7-3|o__I025|f__|g__	3	0	0	0	0	0	0	14	0	1	0	0
k__Bacteria|p__Verrucomicrobia|c__[Pedosphaerae]|o__[Pedosphaerales]|f__|g__	0	0	7	0	0	0	1	6	1	2	0	1
k__Bacteria|p__Proteobacteria|c__Alphaproteobacteria|o__Rhizobiales|f__Bradyrhizobiaceae|g__Balneimonas	0	0	8	0	0	0	0	0	0	3	4	2
k__Bacteria|p__Proteobacteria|c__Alphaproteobacteria|o__Rhodospirillales|f__Acetobacteraceae|g__Roseomonas	0	0	0	11	0	0	1	2	0	0	3	0
k__Bacteria|p__Proteobacteria|c__Gammaproteobacteria|o__|f__|g__	0	0	12	0	0	1	0	0	0	2	0	2
k__Bacteria|p__Acidobacteria|c__Solibacteres|o__Solibacterales|f__Solibacteraceae|g__Candidatus Solibacter	0	0	0	0	0	0	2	1	3	5	2	3
k__Bacteria|p__Actinobacteria|c__Actinobacteria|o__Actinomycetales|f__Actinomycetaceae|g__Actinobaculum	0	0	16	0	0	0	0	0	0	0	0	0
k__Bacteria|p__Actinobacteria|c__Actinobacteria|o__Actinomycetales|f__Gordoniaceae|g__Gordonia	0	0	0	0	0	0	1	0	0	5	8	2
k__Bacteria|p__Actinobacteria|c__Actinobacteria|o__Actinomycetales|f__Microbacteriaceae|g__Cryocola	0	0	0	3	0	0	2	7	0	1	2	1
k__Bacteria|p__Fibrobacteres|c__TG3|o__TG3-1|f__TSCOR003-O20|g__	0	0	0	0	0	0	0	9	0	5	0	2
k__Bacteria|p__Firmicutes|c__Bacilli|o__Bacillales|f__Sporolactobacillaceae|g__	1	3	10	0	0	0	0	0	0	0	0	2
k__Bacteria|p__Firmicutes|c__Clostridia|o__Clostridiales|f__Peptococcaceae|g__	0	0	4	0	0	0	0	0	0	9	2	1
k__Bacteria|p__Proteobacteria|c__Alphaproteobacteria|o__Rhizobiales|f__Beijerinckiaceae|g__	0	2	0	0	0	0	1	1	0	4	5	3
k__Bacteria|p__Proteobacteria|c__Alphaproteobacteria|o__Rhizobiales|f__Methylocystaceae|g__Methylopila	0	0	0	0	0	0	0	1	2	6	5	2
k__Bacteria|p__Proteobacteria|c__Deltaproteobacteria|o__Bdellovibrionales|f__Bacteriovoracaceae|g__	0	0	0	0	0	0	0	5	0	9	2	0
k__Bacteria|p__Verrucomicrobia|c__[Spartobacteria]|o__[Chthoniobacterales]|f__[Chthoniobacteraceae]|g__Chthoniobacter	0	0	0	0	0	0	0	1	1	10	2	2
k__Bacteria|p__Acidobacteria|c__Acidobacteriia|o__Acidobacteriales|f__Acidobacteriaceae|g__Edaphobacter	0	0	2	0	0	0	2	2	4	2	2	1
k__Bacteria|p__Actinobacteria|c__Acidimicrobiia|o__Acidimicrobiales|f__EB1017|g__	0	0	2	0	0	0	2	2	3	5	0	1
k__Bacteria|p__Actinobacteria|c__Actinobacteria|o__Actinomycetales|f__Dermatophilaceae|g__Kineosphaera	13	0	0	0	0	0	2	0	0	0	0	0
k__Bacteria|p__Chloroflexi|c__Ellin6529|o__|f__|g__	0	0	0	0	1	0	2	5	6	1	0	0
k__Bacteria|p__Firmicutes|c__Bacilli|o__Bacillales|f__Pasteuriaceae|g__Pasteuria	3	0	7	0	0	0	1	0	0	3	0	1
k__Bacteria|p__Proteobacteria|c__Alphaproteobacteria|o__Rhizobiales|f__Phyllobacteriaceae|g__Nitratireductor	0	0	0	0	0	0	0	0	0	8	6	1
k__Bacteria|p__Acidobacteria|c__Acidobacteria-6|o__iii1-15|f__|g__	0	0	0	0	0	0	3	0	2	1	7	1
k__Bacteria|p__Actinobacteria|c__Actinobacteria|o__Actinomycetales|f__Microbacteriaceae|g__Leifsonia	7	0	0	0	0	0	0	0	0	2	5	0
k__Bacteria|p__Bacteroidetes|c__Cytophagia|o__Cytophagales|f__Cytophagaceae|g__Pontibacter	0	10	4	0	0	0	0	0	0	0	0	0
k__Bacteria|p__Bacteroidetes|c__[Saprospirae]|o__[Saprospirales]|f__Chitinophagaceae|g__Niabella	10	1	3	0	0	0	0	0	0	0	0	0
k__Bacteria|p__Firmicutes|c__Bacilli|o__Bacillales|f__Staphylococcaceae|g__Jeotgalicoccus	0	2	11	0	0	1	0	0	0	0	0	0
k__Bacteria|p__Firmicutes|c__Bacilli|o__Lactobacillales|f__Carnobacteriaceae|g__Desemzia	4	0	9	0	0	0	0	0	0	0	1	0
k__Bacteria|p__Proteobacteria|c__Deltaproteobacteria|o__Syntrophobacterales|f__Syntrophobacteraceae|g__	0	0	0	0	0	0	0	13	0	1	0	0
k__Bacteria|p__Proteobacteria|c__Gammaproteobacteria|o__Legionellales|f__Coxiellaceae|g__	0	2	0	0	0	0	2	6	0	0	4	0
k__Bacteria|p__WPS-2|c__|o__|f__|g__	0	0	0	0	14	0	0	0	0	0	0	0
k__Bacteria|p__Actinobacteria|c__Acidimicrobiia|o__Acidimicrobiales|f__Microthrixaceae|g__	0	0	0	0	0	0	0	0	0	6	4	3
k__Bacteria|p__Actinobacteria|c__Actinobacteria|o__Actinomycetales|f__Cellulomonadaceae|g__Sediminihabitans	0	0	0	0	0	0	0	0	0	9	2	2
k__Bacteria|p__Actinobacteria|c__Actinobacteria|o__Actinomycetales|f__Nocardiopsaceae|g__Prauseria	0	0	11	0	0	0	0	0	0	2	0	0
k__Bacteria|p__Actinobacteria|c__Actinobacteria|o__Actinomycetales|f__Streptosporangiaceae|g__Streptosporangium	0	0	13	0	0	0	0	0	0	0	0	0
k__Bacteria|p__Firmicutes|c__Clostridia|o__Clostridiales|f__Clostridiaceae|g__Alkaliphilus	0	0	8	0	0	0	0	0	0	0	3	2
k__Bacteria|p__Firmicutes|c__Clostridia|o__Clostridiales|f__Veillonellaceae|g__Sporomusa	0	0	0	0	0	0	0	0	0	5	5	3
k__Bacteria|p__Firmicutes|c__Clostridia|o__Clostridiales|f__Veillonellaceae|g__Veillonella	1	3	0	1	5	0	0	0	0	0	3	0
k__Bacteria|p__Proteobacteria|c__Deltaproteobacteria|o__Bdellovibrionales|f__Bdellovibrionaceae|g__Bdellovibrio	0	1	0	0	0	0	0	0	0	1	10	1
k__Bacteria|p__Proteobacteria|c__Gammaproteobacteria|o__Xanthomonadales|f__Xanthomonadaceae|g__Wohlfahrtiimonas	13	0	0	0	0	0	0	0	0	0	0	0
k__Bacteria|p__Verrucomicrobia|c__[Spartobacteria]|o__[Chthoniobacterales]|f__[Chthoniobacteraceae]|g__	1	0	1	0	0	0	1	1	1	3	2	3
k__Bacteria|p__Actinobacteria|c__Actinobacteria|o__Actinomycetales|f__Intrasporangiaceae|g__Intrasporangium	0	0	0	0	0	0	2	9	1	0	0	0
k__Bacteria|p__Actinobacteria|c__Actinobacteria|o__Actinomycetales|f__Microbacteriaceae|g__Clavibacter	0	0	0	0	0	0	1	10	1	0	0	0
k__Bacteria|p__Chloroflexi|c__Chloroflexi|o__Herpetosiphonales|f__|g__	0	0	0	0	0	12	0	0	0	0	0	0
k__Bacteria|p__Firmicutes|c__Clostridia|o__Clostridiales|f__Gracilibacteraceae|g__	0	3	4	0	0	0	0	0	1	0	2	2
k__Bacteria|p__Proteobacteria|c__Alphaproteobacteria|o__Rhodospirillales|f__Acetobacteraceae|g__Acidiphilium	0	0	12	0	0	0	0	0	0	0	0	0
k__Bacteria|p__Proteobacteria|c__Alphaproteobacteria|o__Sphingomonadales|f__Erythrobacteraceae|g__Lutibacterium	0	0	2	0	0	0	0	0	0	3	7	0
k__Bacteria|p__Proteobacteria|c__Betaproteobacteria|o__MND1|f__|g__	0	0	8	0	0	0	0	1	1	0	2	0
k__Bacteria|p__Proteobacteria|c__Deltaproteobacteria|o__Myxococcales|f__Nannocystaceae|g__Nannocystis	0	0	0	0	0	0	0	0	0	11	1	0
k__Bacteria|p__Proteobacteria|c__Gammaproteobacteria|o__Thiotrichales|f__Piscirickettsiaceae|g__	0	0	0	0	0	0	0	11	1	0	0	0
k__Bacteria|p__Actinobacteria|c__Actinobacteria|o__Actinomycetales|f__Actinosynnemataceae|g__Lentzea	0	0	0	0	0	0	0	6	1	1	1	2
k__Bacteria|p__Actinobacteria|c__Actinobacteria|o__Actinomycetales|f__Microbacteriaceae|g__Mycetocola	2	0	0	0	0	0	1	0	1	5	2	0
k__Bacteria|p__Actinobacteria|c__Actinobacteria|o__Actinomycetales|f__Nakamurellaceae|g__	2	0	0	0	0	0	0	0	0	6	1	2
k__Bacteria|p__Bacteroidetes|c__Flavobacteriia|o__Flavobacteriales|f__[Weeksellaceae]|g__Wautersiella	4	4	0	0	0	0	0	0	3	0	0	0
k__Bacteria|p__Elusimicrobia|c__Elusimicrobia|o__Elusimicrobiales|f__|g__	0	0	0	11	0	0	0	0	0	0	0	0
k__Bacteria|p__Firmicutes|c__Clostridia|o__Clostridiales|f__Lachnospiraceae|g__Catonella	0	0	0	7	0	0	0	4	0	0	0	0
k__Bacteria|p__Gemmatimonadetes|c__Gemmatimonadetes|o__Gemmatimonadales|f__|g__	1	1	0	0	0	0	0	6	1	0	1	1
k__Bacteria|p__Proteobacteria|c__Alphaproteobacteria|o__Rhodobacterales|f__Rhodobacteraceae|g__Roseicyclus	0	11	0	0	0	0	0	0	0	0	0	0
k__Bacteria|p__Proteobacteria|c__Gammaproteobacteria|o__Legionellales|f__Legionellaceae|g__Legionella	0	0	2	0	0	0	2	2	1	4	0	0
k__Bacteria|p__Verrucomicrobia|c__[Spartobacteria]|o__[Chthoniobacterales]|f__01D2Z36|g__	0	0	0	0	0	0	1	0	1	8	1	0
k__Bacteria|p__Actinobacteria|c__Actinobacteria|o__Actinomycetales|f__Intrasporangiaceae|g__Lapillicoccus	0	0	0	0	0	0	1	7	0	0	2	0
k__Bacteria|p__Bacteroidetes|c__Bacteroidia|o__Bacteroidales|f__|g__	0	3	0	0	1	0	0	6	0	0	0	0
k__Bacteria|p__Chloroflexi|c__Ktedonobacteria|o__Ktedonobacterales|f__Ktedonobacteraceae|g__	0	0	0	0	0	0	0	1	4	1	3	1
k__Bacteria|p__Firmicutes|c__Bacilli|o__Bacillales|f__Sporolactobacillaceae|g__Pullulanibacillus	0	0	0	0	0	0	0	0	0	8	0	2
k__Bacteria|p__Firmicutes|c__Bacilli|o__Haloplasmatales|f__Haloplasmataceae|g__	0	0	0	10	0	0	0	0	0	0	0	0
k__Bacteria|p__Firmicutes|c__Clostridia|o__Clostridiales|f__Clostridiaceae|g__Oxobacter	0	0	0	0	0	0	0	0	0	0	10	0
k__Bacteria|p__Proteobacteria|c__Alphaproteobacteria|o__Rhizobiales|f__Phyllobacteriaceae|g__Aminobacter	0	0	0	0	0	0	0	0	0	3	2	5
k__Bacteria|p__Proteobacteria|c__Alphaproteobacteria|o__Rhodospirillales|f__Rhodospirillaceae|g__Magnetospirillum	0	0	10	0	0	0	0	0	0	0	0	0
k__Bacteria|p__Proteobacteria|c__Betaproteobacteria|o__Burkholderiales|f__Alcaligenaceae|g__Pigmentiphaga	6	0	0	0	0	0	0	0	2	0	1	1
k__Bacteria|p__Proteobacteria|c__Deltaproteobacteria|o__[Entotheonellales]|f__[Entotheonellaceae]|g__	0	0	0	0	0	0	0	9	1	0	0	0
k__Bacteria|p__Proteobacteria|c__Gammaproteobacteria|o__Enterobacteriales|f__Enterobacteriaceae|g__Yersinia	0	1	0	0	0	0	1	8	0	0	0	0
k__Bacteria|p__Proteobacteria|c__Gammaproteobacteria|o__Legionellales|f__Legionellaceae|g__	0	0	0	0	0	0	0	0	2	0	6	2
k__Bacteria|p__Verrucomicrobia|c__Verrucomicrobiae|o__Verrucomicrobiales|f__Verrucomicrobiaceae|g__	0	0	0	0	0	0	0	0	0	2	8	0
k__Bacteria|p__Acidobacteria|c__[Chloracidobacteria]|o__DS-100|f__|g__	0	0	0	0	0	0	1	3	0	3	2	0
k__Bacteria|p__Acidobacteria|c__[Chloracidobacteria]|o__RB41|f__Ellin6075|g__	0	0	0	0	0	0	0	0	3	4	1	1
k__Bacteria|p__Actinobacteria|c__Actinobacteria|o__Actinomycetales|f__Nocardiopsaceae|g__Nocardiopsis	0	0	0	0	0	0	0	8	1	0	0	0
k__Bacteria|p__Armatimonadetes|c__0319-6E2|o__|f__|g__	0	0	0	0	0	0	2	0	2	2	0	3
k__Bacteria|p__Bacteroidetes|c__Cytophagia|o__Cytophagales|f__Cytophagaceae|g__Larkinella	0	0	9	0	0	0	0	0	0	0	0	0
k__Bacteria|p__Bacteroidetes|c__[Saprospirae]|o__[Saprospirales]|f__Chitinophagaceae|g__Sediminibacterium	1	0	0	0	0	5	0	0	1	0	0	2
k__Bacteria|p__Firmicutes|c__Clostridia|o__Clostridiales|f__Caldicoprobacteraceae|g__Caldicoprobacter	0	0	9	0	0	0	0	0	0	0	0	0
k__Bacteria|p__Firmicutes|c__Clostridia|o__Clostridiales|f__[Tissierellaceae]|g__Sporanaerobacter	0	2	0	0	0	0	0	0	0	4	1	2
k__Bacteria|p__Proteobacteria|c__Betaproteobacteria|o__Burkholderiales|f__Oxalobacteraceae|g__Herminiimonas	0	0	0	0	0	0	1	0	0	3	5	0
k__Bacteria|p__Proteobacteria|c__Gammaproteobacteria|o__Xanthomonadales|f__Xanthomonadaceae|g__Luteimonas	0	8	0	1	0	0	0	0	0	0	0	0
k__Bacteria|p__Actinobacteria|c__Actinobacteria|o__Actinomycetales|f__Intrasporangiaceae|g__Janibacter	0	0	8	0	0	0	0	0	0	0	0	0
k__Bacteria|p__Actinobacteria|c__Actinobacteria|o__Actinomycetales|f__Micromonosporaceae|g__Couchioplanes	0	0	0	0	0	0	0	8	0	0	0	0
k__Bacteria|p__Actinobacteria|c__Actinobacteria|o__Actinomycetales|f__Streptosporangiaceae|g__Sphaerisporangium	0	0	0	0	0	0	0	5	0	0	3	0
k__Bacteria|p__Chloroflexi|c__Chloroflexi|o__[Roseiflexales]|f__[Kouleothrixaceae]|g__Kouleothrix	0	0	0	0	0	0	1	0	2	4	0	1
k__Bacteria|p__Firmicutes|c__Bacilli|o__Lactobacillales|f__Lactobacillaceae|g__Pediococcus	2	0	0	0	0	0	2	4	0	0	0	0
k__Bacteria|p__Planctomycetes|c__Planctomycetia|o__Pirellulales|f__Pirellulaceae|g__Pirellula	0	1	0	0	0	0	0	0	3	3	0	1
k__Bacteria|p__Proteobacteria|c__Betaproteobacteria|o__Burkholderiales|f__Comamonadaceae|g__Hydrogenophaga	0	0	0	0	0	0	0	0	1	2	3	2
k__Bacteria|p__Proteobacteria|c__Betaproteobacteria|o__Burkholderiales|f__Comamonadaceae|g__Xenophilus	3	0	0	0	0	0	0	0	1	0	4	0
k__Bacteria|p__Proteobacteria|c__Gammaproteobacteria|o__Alteromonadales|f__Alteromonadaceae|g__Cellvibrio	0	0	0	0	0	0	0	0	1	7	0	0
k__Bacteria|p__Proteobacteria|c__Gammaproteobacteria|o__Oceanospirillales|f__Halomonadaceae|g__Candidatus Portiera	0	0	0	1	0	0	0	7	0	0	0	0
k__Bacteria|p__TM6|c__SJA-4|o__|f__|g__	0	0	0	0	0	0	0	0	0	0	7	1
k__Bacteria|p__Acidobacteria|c__Acidobacteriia|o__Acidobacteriales|f__Koribacteraceae|g__	1	0	0	0	0	0	0	0	1	0	5	0
k__Bacteria|p__Actinobacteria|c__Actinobacteria|o__Actinomycetales|f__Geodermatophilaceae|g__Geodermatophilus	0	1	0	0	0	0	0	1	0	1	2	2
k__Bacteria|p__Actinobacteria|c__Actinobacteria|o__Actinomycetales|f__Nocardioidaceae|g__Kribbella	0	0	0	0	0	0	0	2	2	3	0	0
k__Bacteria|p__Actinobacteria|c__Actinobacteria|o__Actinomycetales|f__Propionibacteriaceae|g__Luteococcus	0	5	0	2	0	0	0	0	0	0	0	0
k__Bacteria|p__Actinobacteria|c__Actinobacteria|o__Micrococcales|f__|g__	0	0	0	0	0	0	2	0	1	1	1	2
k__Bacteria|p__Actinobacteria|c__Thermoleophilia|o__Solirubrobacterales|f__Conexibacteraceae|g__Conexibacter	0	0	7	0	0	0	0	0	0	0	0	0
k__Bacteria|p__Cyanobacteria|c__ML635J-21|o__|f__|g__	0	0	6	0	0	0	0	0	1	0	0	0
k__Bacteria|p__Firmicutes|c__Bacilli|o__Bacillales|f__Listeriaceae|g__Listeria	0	0	1	0	0	0	0	2	1	1	1	1
k__Bacteria|p__Firmicutes|c__Bacilli|o__Bacillales|f__Thermoactinomycetaceae|g__Thermoflavimicrobium	0	1	6	0	0	0	0	0	0	0	0	0
k__Bacteria|p__Firmicutes|c__Clostridia|o__Clostridiales|f__SBYG_4172|g__	0	0	0	0	0	0	1	0	0	6	0	0
k__Bacteria|p__Firmicutes|c__Clostridia|o__Clostridiales|f__Syntrophomonadaceae|g__Syntrophomonas	0	0	0	0	0	0	1	0	2	1	3	0
k__Bacteria|p__Firmicutes|c__Clostridia|o__MBA08|f__|g__	0	0	0	0	0	0	0	0	1	5	0	1
k__Bacteria|p__Gemmatimonadetes|c__Gemm-1|o__|f__|g__	0	0	2	0	0	0	1	2	0	0	1	1
k__Bacteria|p__Proteobacteria|c__Alphaproteobacteria|o__Rhodobacterales|f__Hyphomonadaceae|g__	0	0	0	0	0	0	0	3	0	0	3	1
k__Bacteria|p__Proteobacteria|c__Alphaproteobacteria|o__Rickettsiales|f__|g__	2	0	0	0	0	0	0	0	0	3	1	1
k__Bacteria|p__Proteobacteria|c__Alphaproteobacteria|o__Sphingomonadales|f__Erythrobacteraceae|g__Erythromicrobium	0	7	0	0	0	0	0	0	0	0	0	0
k__Bacteria|p__Proteobacteria|c__Betaproteobacteria|o__Burkholderiales|f__Alcaligenaceae|g__Sutterella	0	0	0	0	0	0	0	7	0	0	0	0
k__Bacteria|p__Proteobacteria|c__Betaproteobacteria|o__Burkholderiales|f__Comamonadaceae|g__Rubrivivax	0	0	0	0	0	0	0	5	2	0	0	0
k__Bacteria|p__Proteobacteria|c__Betaproteobacteria|o__SC-I-84|f__|g__	0	0	0	0	0	0	0	0	1	2	1	3
k__Bacteria|p__TM7|c__TM7-3|o__CW040|f__|g__	0	7	0	0	0	0	0	0	0	0	0	0
k__Archaea|p__Crenarchaeota|c__Thaumarchaeota|o__Nitrososphaerales|f__Nitrososphaeraceae|g__Candidatus Nitrososphaera	2	0	0	0	0	0	1	1	2	0	0	0
k__Archaea|p__Euryarchaeota|c__Methanobacteria|o__Methanobacteriales|f__Methanobacteriaceae|g__Methanobacterium	0	0	0	0	0	0	0	0	0	0	6	0
k__Bacteria|p__Acidobacteria|c__Acidobacteriia|o__Acidobacteriales|f__Koribacteraceae|g__Candidatus Koribacter	0	0	0	0	0	0	0	0	0	2	4	0
k__Bacteria|p__Actinobacteria|c__Actinobacteria|o__Actinomycetales|f__Actinosynnemataceae|g__	0	0	0	0	0	0	0	5	0	0	1	0
k__Bacteria|p__Bacteroidetes|c__Cytophagia|o__Cytophagales|f__Flammeovirgaceae|g__Marivirga	0	6	0	0	0	0	0	0	0	0	0	0
k__Bacteria|p__Chlorobi|c__OPB56|o__|f__|g__	0	0	0	5	0	0	0	0	0	1	0	0
k__Bacteria|p__Firmicutes|c__Bacilli|o__Bacillales|f__[Thermicanaceae]|g__Thermicanus	0	0	6	0	0	0	0	0	0	0	0	0
k__Bacteria|p__Firmicutes|c__Bacilli|o__Gemellales|f__Gemellaceae|g__	0	0	0	1	1	0	0	0	0	0	4	0
k__Bacteria|p__Firmicutes|c__Bacilli|o__Lactobacillales|f__Streptococcaceae|g__Lactococcus	1	0	0	1	0	0	0	4	0	0	0	0
k__Bacteria|p__Firmicutes|c__Clostridia|o__Clostridiales|f__Peptococcaceae|g__Desulfotomaculum	0	0	0	0	0	0	0	0	0	1	5	0
k__Bacteria|p__Firmicutes|c__Clostridia|o__Clostridiales|f__[Mogibacteriaceae]|g__Anaerovorax	0	0	2	0	0	0	0	0	0	2	1	1
k__Bacteria|p__Firmicutes|c__Erysipelotrichi|o__Erysipelotrichales|f__Erysipelotrichaceae|g__	0	0	0	0	0	0	0	0	0	2	1	3
k__Bacteria|p__Planctomycetes|c__Phycisphaerae|o__WD2101|f__|g__	0	0	0	0	0	0	1	0	1	1	2	1
k__Bacteria|p__Proteobacteria|c__Alphaproteobacteria|o__Rhizobiales|f__Methylocystaceae|g__Pleomorphomonas	0	2	0	0	0	0	0	0	2	0	0	2
k__Bacteria|p__Proteobacteria|c__Alphaproteobacteria|o__Rhizobiales|f__Rhizobiaceae|g__Candidatus Liberibacter	0	0	0	0	0	0	0	6	0	0	0	0
k__Bacteria|p__Proteobacteria|c__Betaproteobacteria|o__Burkholderiales|f__Burkholderiaceae|g__Salinispora	0	0	0	0	0	0	2	0	3	0	0	1
k__Bacteria|p__Proteobacteria|c__Betaproteobacteria|o__Burkholderiales|f__Comamonadaceae|g__Diaphorobacter	0	0	1	1	2	0	0	2	0	0	0	0
k__Bacteria|p__Proteobacteria|c__Betaproteobacteria|o__Nitrosomonadales|f__Nitrosomonadaceae|g__	0	0	0	0	0	0	0	6	0	0	0	0
k__Bacteria|p__Proteobacteria|c__Gammaproteobacteria|o__Enterobacteriales|f__Enterobacteriaceae|g__Leminorella	0	0	6	0	0	0	0	0	0	0	0	0
k__Bacteria|p__Spirochaetes|c__Spirochaetes|o__Spirochaetales|f__Spirochaetaceae|g__Treponema	0	0	0	0	0	0	0	0	0	0	6	0
k__Bacteria|p__Verrucomicrobia|c__Opitutae|o__Opitutales|f__Opitutaceae|g__Opitutus	0	0	0	0	0	0	0	0	0	2	0	4
k__Archaea|p__Euryarchaeota|c__Methanomicrobia|o__Methanosarcinales|f__Methanosaetaceae|g__Methanosaeta	0	0	0	0	0	0	0	0	0	2	3	0
k__Bacteria|p__Bacteroidetes|c__Flavobacteriia|o__Flavobacteriales|f__Cryomorphaceae|g__	0	0	0	0	0	0	0	0	0	2	1	2
k__Bacteria|p__Bacteroidetes|c__Sphingobacteriia|o__Sphingobacteriales|f__|g__	0	0	0	0	0	0	0	0	0	1	2	2
k__Bacteria|p__Bacteroidetes|c__Sphingobacteriia|o__Sphingobacteriales|f__Sphingobacteriaceae|g__Mucilaginibacter	0	0	0	0	0	0	0	3	2	0	0	0
k__Bacteria|p__Chloroflexi|c__Gitt-GS-136|o__|f__|g__	0	0	3	0	0	0	0	0	0	2	0	0
k__Bacteria|p__Chloroflexi|c__Ktedonobacteria|o__JG30-KF-AS9|f__|g__	0	0	0	0	0	0	0	0	1	0	3	1
k__Bacteria|p__Cyanobacteria|c__Synechococcophycideae|o__Pseudanabaenales|f__Pseudanabaenaceae|g__	0	5	0	0	0	0	0	0	0	0	0	0
k__Bacteria|p__Firmicutes|c__Bacilli|o__Bacillales|f__Bacillaceae|g__Natronobacillus	0	0	0	0	0	0	0	0	0	4	0	1
k__Bacteria|p__Firmicutes|c__Clostridia|o__Clostridiales|f__Gracilibacteraceae|g__Lutispora	0	0	0	0	0	0	0	0	1	2	1	1
k__Bacteria|p__Firmicutes|c__Clostridia|o__Clostridiales|f__Peptococcaceae|g__Pelotomaculum	0	0	0	0	0	0	0	0	1	0	1	3
k__Bacteria|p__Firmicutes|c__Clostridia|o__Clostridiales|f__Ruminococcaceae|g__Clostridium	0	0	0	0	0	0	0	0	1	1	0	3
k__Bacteria|p__Firmicutes|c__Clostridia|o__Clostridiales|f__Ruminococcaceae|g__Ethanoligenens	0	0	0	0	0	0	0	0	0	4	0	1
k__Bacteria|p__Proteobacteria|c__Alphaproteobacteria|o__Rhizobiales|f__Methylocystaceae|g__Methylosinus	0	0	0	0	0	0	0	0	0	3	1	1
k__Bacteria|p__Proteobacteria|c__Alphaproteobacteria|o__Rhizobiales|f__Phyllobacteriaceae|g__Phyllobacterium	0	1	0	0	0	0	1	0	0	2	1	0
k__Bacteria|p__Proteobacteria|c__Alphaproteobacteria|o__Rhodobacterales|f__Rhodobacteraceae|g__Rhodobacter	1	0	0	0	0	0	2	0	2	0	0	0
k__Bacteria|p__Proteobacteria|c__Betaproteobacteria|o__Burkholderiales|f__Comamonadaceae|g__Azohydromonas	0	0	0	0	0	0	0	0	1	0	3	1
k__Bacteria|p__Proteobacteria|c__Betaproteobacteria|o__Ellin6067|f__|g__	0	0	0	0	0	0	1	0	0	4	0	0
k__Bacteria|p__Proteobacteria|c__Betaproteobacteria|o__Rhodocyclales|f__Rhodocyclaceae|g__Uliginosibacterium	0	0	0	0	0	0	0	5	0	0	0	0
k__Bacteria|p__Proteobacteria|c__Epsilonproteobacteria|o__Campylobacterales|f__Helicobacteraceae|g__	0	0	0	5	0	0	0	0	0	0	0	0
k__Bacteria|p__Proteobacteria|c__Gammaproteobacteria|o__Enterobacteriales|f__Enterobacteriaceae|g__Citrobacter	0	2	0	0	0	0	2	1	0	0	0	0
k__Bacteria|p__Proteobacteria|c__Gammaproteobacteria|o__Vibrionales|f__Vibrionaceae|g__Salinivibrio	5	0	0	0	0	0	0	0	0	0	0	0
k__Bacteria|p__Verrucomicrobia|c__Verrucomicrobiae|o__Verrucomicrobiales|f__Verrucomicrobiaceae|g__Luteolibacter	0	0	0	0	0	0	0	0	0	4	1	0
k__Bacteria|p__Verrucomicrobia|c__[Pedosphaerae]|o__[Pedosphaerales]|f__auto67_4W|g__	0	0	0	0	0	0	0	0	0	2	3	0
k__Bacteria|p__Verrucomicrobia|c__[Spartobacteria]|o__[Chthoniobacterales]|f__[Chthoniobacteraceae]|g__Ellin506	0	0	0	0	0	0	0	0	0	2	1	2
k__Bacteria|p__Actinobacteria|c__Actinobacteria|o__Actinomycetales|f__Beutenbergiaceae|g__Serinibacter	0	0	0	0	0	0	0	0	0	4	0	0
k__Bacteria|p__Actinobacteria|c__Actinobacteria|o__Actinomycetales|f__Bogoriellaceae|g__Georgenia	0	0	0	0	0	0	1	0	1	1	0	1
k__Bacteria|p__Actinobacteria|c__Actinobacteria|o__Actinomycetales|f__Nocardiopsaceae|g__	0	0	0	0	0	0	0	0	0	4	0	0
k__Bacteria|p__Actinobacteria|c__Coriobacteriia|o__Coriobacteriales|f__Coriobacteriaceae|g__Atopobium	4	0	0	0	0	0	0	0	0	0	0	0
k__Bacteria|p__Chlamydiae|c__Chlamydiia|o__Chlamydiales|f__Parachlamydiaceae|g__	0	0	0	0	0	0	0	0	0	0	1	3
k__Bacteria|p__Firmicutes|c__Bacilli|o__Bacillales|f__Bacillaceae|g__Gracilibacillus	0	0	0	0	0	0	0	0	0	0	1	3
k__Bacteria|p__Firmicutes|c__Clostridia|o__Clostridiales|f__Peptococcaceae|g__Sporotomaculum	0	0	0	0	0	0	0	0	0	4	0	0
k__Bacteria|p__Firmicutes|c__Clostridia|o__Clostridiales|f__Veillonellaceae|g__G07	0	0	0	0	0	0	0	0	0	4	0	0
k__Bacteria|p__Gemmatimonadetes|c__Gemm-5|o__|f__|g__	0	0	0	0	0	0	0	0	0	2	0	2
k__Bacteria|p__Gemmatimonadetes|c__Gemmatimonadetes|o__Ellin5290|f__|g__	0	0	0	0	0	0	1	0	0	2	0	1
k__Bacteria|p__Proteobacteria|c__Betaproteobacteria|o__Burkholderiales|f__Comamonadaceae|g__Variovorax	0	0	0	0	0	0	0	2	0	0	0	2
k__Bacteria|p__Proteobacteria|c__Deltaproteobacteria|o__|f__|g__	0	0	0	0	0	0	1	0	0	2	1	0
k__Bacteria|p__Proteobacteria|c__Gammaproteobacteria|o__Methylococcales|f__Methylococcaceae|g__Methylocaldum	0	0	0	0	0	0	0	0	0	0	2	2
k__Bacteria|p__Proteobacteria|c__Gammaproteobacteria|o__Oceanospirillales|f__Oceanospirillaceae|g__Marinomonas	0	4	0	0	0	0	0	0	0	0	0	0
k__Bacteria|p__Tenericutes|c__Mollicutes|o__RF39|f__|g__	2	0	0	0	0	0	0	0	1	0	1	0
k__Bacteria|p__Verrucomicrobia|c__[Methylacidiphilae]|o__Methylacidiphilales|f__|g__	0	0	0	0	0	0	0	0	0	1	0	3
k__Bacteria|p__Verrucomicrobia|c__[Pedosphaerae]|o__[Pedosphaerales]|f__Ellin517|g__	0	0	0	0	0	0	0	0	0	1	3	0
k__Bacteria|p__Verrucomicrobia|c__[Pedosphaerae]|o__[Pedosphaerales]|f__[Pedosphaeraceae]|g__Pedosphaera	0	0	0	0	0	0	0	0	0	0	4	0
k__Bacteria|p__Acidobacteria|c__Acidobacteria-5|o__|f__|g__	0	0	0	0	0	0	0	0	2	1	0	0
k__Bacteria|p__Acidobacteria|c__Solibacteres|o__Solibacterales|f__[Bryobacteraceae]|g__	0	0	0	0	0	0	0	0	0	0	3	0
k__Bacteria|p__Acidobacteria|c__[Chloracidobacteria]|o__RB41|f__|g__	0	0	0	0	0	0	0	0	3	0	0	0
k__Bacteria|p__Actinobacteria|c__Actinobacteria|o__Actinomycetales|f__Actinomycetaceae|g__Varibaculum	0	0	0	3	0	0	0	0	0	0	0	0
k__Bacteria|p__Actinobacteria|c__Actinobacteria|o__Actinomycetales|f__Intrasporangiaceae|g__Serinicoccus	0	0	0	0	0	0	3	0	0	0	0	0
k__Bacteria|p__Actinobacteria|c__Actinobacteria|o__Actinomycetales|f__Microbacteriaceae|g__Schumannella	0	0	0	0	0	0	0	0	0	0	0	3
k__Bacteria|p__Actinobacteria|c__Actinobacteria|o__Actinomycetales|f__Thermomonosporaceae|g__Actinoallomurus	0	0	0	0	0	0	0	0	0	2	0	1
k__Bacteria|p__Actinobacteria|c__OPB41|o__|f__|g__	0	0	0	0	0	0	0	0	0	0	2	1
k__Bacteria|p__Actinobacteria|c__Thermoleophilia|o__Solirubrobacterales|f__Patulibacteraceae|g__Patulibacter	0	0	0	0	0	0	0	0	1	1	1	0
k__Bacteria|p__BRC1|c__PRR-11|o__|f__|g__	0	2	0	0	0	0	0	0	0	0	1	0
k__Bacteria|p__Bacteroidetes|c__Flavobacteriia|o__Flavobacteriales|f__Blattabacteriaceae|g__Blattabacterium	3	0	0	0	0	0	0	0	0	0	0	0
k__Bacteria|p__Chloroflexi|c__Anaerolineae|o__SBR1031|f__A4b|g__	0	0	0	0	0	0	1	0	0	0	2	0
k__Bacteria|p__Chloroflexi|c__Ktedonobacteria|o__Thermogemmatisporales|f__Thermogemmatisporaceae|g__	0	0	0	0	0	0	0	0	0	1	2	0
k__Bacteria|p__Chloroflexi|c__Thermomicrobia|o__|f__|g__	0	1	0	0	0	0	0	0	0	1	1	0
k__Bacteria|p__Cyanobacteria|c__4C0d-2|o__SM1D11|f__|g__	0	0	0	0	0	0	0	0	0	1	2	0
k__Bacteria|p__Cyanobacteria|c__Nostocophycideae|o__Nostocales|f__Nostocaceae|g__Anabaena	0	0	0	0	0	0	0	0	0	0	2	1
k__Bacteria|p__Elusimicrobia|c__Endomicrobia|o__|f__|g__	0	0	0	0	0	0	0	0	0	3	0	0
k__Bacteria|p__Firmicutes|c__Bacilli|o__Bacillales|f__Bacillaceae|g__Marinibacillus	0	0	0	0	0	0	0	0	0	3	0	0
k__Bacteria|p__Firmicutes|c__Bacilli|o__Bacillales|f__Listeriaceae|g__Brochothrix	2	1	0	0	0	0	0	0	0	0	0	0
k__Bacteria|p__Firmicutes|c__Bacilli|o__Lactobacillales|f__Enterococcaceae|g__	1	0	1	0	0	0	0	0	0	0	0	1
k__Bacteria|p__Firmicutes|c__Clostridia|o__Clostridiales|f__Clostridiaceae|g__Thermoanaerobacterium	0	0	0	0	0	0	0	0	0	2	0	1
k__Bacteria|p__Firmicutes|c__Clostridia|o__Clostridiales|f__Lachnospiraceae|g__Moryella	3	0	0	0	0	0	0	0	0	0	0	0
k__Bacteria|p__Firmicutes|c__Clostridia|o__Clostridiales|f__[Tissierellaceae]|g__Tepidimicrobium	0	0	0	0	0	0	0	0	0	0	2	1
k__Bacteria|p__Kazan-3B-28|c__|o__|f__|g__	0	0	0	0	0	0	1	1	1	0	0	0
k__Bacteria|p__Planctomycetes|c__Planctomycetia|o__Gemmatales|f__Gemmataceae|g__	0	0	0	0	0	0	0	0	1	1	1	0
k__Bacteria|p__Planctomycetes|c__Planctomycetia|o__Gemmatales|f__Isosphaeraceae|g__Nostocoida	0	0	0	0	0	0	0	0	0	1	2	0
k__Bacteria|p__Proteobacteria|c__Alphaproteobacteria|o__Rhizobiales|f__Beijerinckiaceae|g__Beijerinckia	0	0	0	0	0	0	0	0	0	0	2	1
k__Bacteria|p__Proteobacteria|c__Alphaproteobacteria|o__Rhizobiales|f__Rhodobiaceae|g__	1	0	2	0	0	0	0	0	0	0	0	0
k__Bacteria|p__Proteobacteria|c__Alphaproteobacteria|o__Rhizobiales|f__Rhodobiaceae|g__Afifella	0	0	2	0	0	0	0	0	0	0	1	0
k__Bacteria|p__Proteobacteria|c__Alphaproteobacteria|o__Rhodobacterales|f__Rhodobacteraceae|g__Anaerospora	0	0	3	0	0	0	0	0	0	0	0	0
k__Bacteria|p__Proteobacteria|c__Betaproteobacteria|o__Burkholderiales|f__Burkholderiaceae|g__Lautropia	0	0	0	0	0	0	0	0	1	0	2	0
k__Bacteria|p__Proteobacteria|c__Betaproteobacteria|o__Burkholderiales|f__Comamonadaceae|g__Roseateles	3	0	0	0	0	0	0	0	0	0	0	0
k__Bacteria|p__Proteobacteria|c__Deltaproteobacteria|o__Myxococcales|f__Polyangiaceae|g__Polyangium	0	0	0	0	0	0	3	0	0	0	0	0
k__Bacteria|p__Proteobacteria|c__Deltaproteobacteria|o__Spirobacillales|f__|g__	0	0	0	0	0	0	1	0	0	2	0	0
k__Bacteria|p__Proteobacteria|c__Gammaproteobacteria|o__Alteromonadales|f__[Chromatiaceae]|g__Rheinheimera	3	0	0	0	0	0	0	0	0	0	0	0
k__Bacteria|p__Proteobacteria|c__Gammaproteobacteria|o__Enterobacteriales|f__Enterobacteriaceae|g__Salmonella	0	0	0	0	0	0	0	0	1	0	2	0
k__Bacteria|p__Proteobacteria|c__Gammaproteobacteria|o__Enterobacteriales|f__Enterobacteriaceae|g__Trabulsiella	0	0	0	0	0	0	0	0	1	1	0	1
k__Bacteria|p__Proteobacteria|c__Gammaproteobacteria|o__Oceanospirillales|f__Oceanospirillaceae|g__Oleibacter	0	0	0	0	0	0	0	3	0	0	0	0
k__Bacteria|p__TM7|c__SC3|o__|f__|g__	0	0	0	0	0	0	0	0	0	0	3	0
k__Bacteria|p__TM7|c__TM7-3|o__I025|f__Rs-045|g__	3	0	0	0	0	0	0	0	0	0	0	0
k__Bacteria|p__Verrucomicrobia|c__Verrucomicrobiae|o__Verrucomicrobiales|f__Verrucomicrobiaceae|g__Prosthecobacter	0	0	0	0	0	0	0	0	0	1	2	0
k__Bacteria|p__Verrucomicrobia|c__[Pedosphaerae]|o__[Pedosphaerales]|f__Ellin515|g__	0	0	0	0	0	0	0	0	0	0	3	0
k__Bacteria|p__Verrucomicrobia|c__[Spartobacteria]|o__[Chthoniobacterales]|f__[Chthoniobacteraceae]|g__DA101	0	0	0	0	0	0	0	1	1	0	1	0
k__Bacteria|p__Actinobacteria|c__Actinobacteria|o__Actinomycetales|f__Actinosynnemataceae|g__Actinoalloteichus	0	0	0	0	0	0	0	0	0	0	1	1
k__Bacteria|p__Actinobacteria|c__Actinobacteria|o__Actinomycetales|f__Actinosynnemataceae|g__Saccharothrix	0	0	0	0	0	0	0	0	0	0	0	2
k__Bacteria|p__Actinobacteria|c__Actinobacteria|o__Actinomycetales|f__Beutenbergiaceae|g__Beutenbergia	0	0	0	0	0	0	0	0	0	1	1	0
k__Bacteria|p__Actinobacteria|c__Actinobacteria|o__Actinomycetales|f__Dietziaceae|g__	0	0	0	2	0	0	0	0	0	0	0	0
k__Bacteria|p__Actinobacteria|c__Actinobacteria|o__Actinomycetales|f__Frankiaceae|g__Actinomycetales	0	0	0	0	0	0	0	0	0	2	0	0
k__Bacteria|p__Actinobacteria|c__Actinobacteria|o__Actinomycetales|f__Frankiaceae|g__Frankia	0	0	0	0	0	0	1	0	1	0	0	0
k__Bacteria|p__Actinobacteria|c__Actinobacteria|o__Actinomycetales|f__Intrasporangiaceae|g__Knoellia	0	1	0	0	0	0	1	0	0	0	0	0
k__Bacteria|p__Actinobacteria|c__Actinobacteria|o__Actinomycetales|f__Microbacteriaceae|g__Curtobacterium	0	0	0	1	0	0	0	0	0	0	0	1
k__Bacteria|p__Actinobacteria|c__Actinobacteria|o__Actinomycetales|f__Thermomonosporaceae|g__Spirillospora	0	0	0	1	0	0	0	0	0	0	0	1
k__Bacteria|p__Armatimonadetes|c__Chthonomonadetes|o__SJA-22|f__|g__	0	0	0	0	0	0	2	0	0	0	0	0
k__Bacteria|p__Chlamydiae|c__Chlamydiia|o__Chlamydiales|f__Parachlamydiaceae|g__Candidatus Protochlamydia	0	1	0	0	0	0	0	0	1	0	0	0
k__Bacteria|p__Chloroflexi|c__Anaerolineae|o__A31|f__|g__	0	0	0	0	0	0	0	0	0	0	2	0
k__Bacteria|p__Chloroflexi|c__Anaerolineae|o__Caldilineales|f__Caldilineaceae|g__	0	0	0	0	0	0	0	0	1	0	0	1
k__Bacteria|p__Chloroflexi|c__Anaerolineae|o__Caldilineales|f__Caldilineaceae|g__Caldilinea	0	0	0	0	0	0	0	2	0	0	0	0
k__Bacteria|p__Chloroflexi|c__TK17|o__|f__|g__	0	0	0	0	0	0	0	0	0	2	0	0
k__Bacteria|p__Chloroflexi|c__TK17|o__mle1-48|f__|g__	0	0	0	0	0	0	1	0	0	0	0	1
k__Bacteria|p__Cyanobacteria|c__Synechococcophycideae|o__Pseudanabaenales|f__Pseudanabaenaceae|g__Leptolyngbya	0	1	0	0	0	0	0	0	1	0	0	0
k__Bacteria|p__Cyanobacteria|c__Synechococcophycideae|o__Pseudanabaenales|f__Pseudanabaenaceae|g__Nodosilinea	0	2	0	0	0	0	0	0	0	0	0	0
k__Bacteria|p__Firmicutes|c__Clostridia|o__Clostridiales|f__Eubacteriaceae|g__	0	0	0	0	0	0	0	0	0	2	0	0
k__Bacteria|p__Firmicutes|c__Clostridia|o__Clostridiales|f__Lachnospiraceae|g__Dorea	1	1	0	0	0	0	0	0	0	0	0	0
k__Bacteria|p__Firmicutes|c__Clostridia|o__Clostridiales|f__Peptostreptococcaceae|g__Clostridium	0	0	0	0	0	0	0	0	0	2	0	0
k__Bacteria|p__Firmicutes|c__Clostridia|o__Clostridiales|f__Veillonellaceae|g__BSV43	0	0	0	0	0	0	1	0	0	0	0	1
k__Bacteria|p__Firmicutes|c__Clostridia|o__Halanaerobiales|f__|g__	0	0	0	0	0	0	0	2	0	0	0	0
k__Bacteria|p__Firmicutes|c__Clostridia|o__Halanaerobiales|f__Halanaerobiaceae|g__	0	0	0	0	0	0	0	0	0	0	0	2
k__Bacteria|p__Gemmatimonadetes|c__Gemmatimonadetes|o__Gemmatimonadales|f__Ellin5301|g__	0	0	0	0	0	0	1	0	1	0	0	0
k__Bacteria|p__Nitrospirae|c__Nitrospira|o__Nitrospirales|f__0319-6A21|g__	0	0	0	0	0	0	0	2	0	0	0	0
k__Bacteria|p__Nitrospirae|c__Nitrospira|o__Nitrospirales|f__Nitrospiraceae|g__Nitrospira	0	0	0	0	0	0	1	1	0	0	0	0
k__Bacteria|p__Proteobacteria|c__Alphaproteobacteria|o__Rhizobiales|f__Hyphomicrobiaceae|g__Pedomicrobium	0	0	2	0	0	0	0	0	0	0	0	0
k__Bacteria|p__Proteobacteria|c__Alphaproteobacteria|o__Rhodospirillales|f__Acetobacteraceae|g__Belnapia	0	1	0	0	0	0	0	0	0	0	1	0
k__Bacteria|p__Proteobacteria|c__Alphaproteobacteria|o__Rhodospirillales|f__Acetobacteraceae|g__Paracraurococcus	0	0	0	0	0	0	0	0	0	2	0	0
k__Bacteria|p__Proteobacteria|c__Alphaproteobacteria|o__Rickettsiales|f__Rickettsiaceae|g__Rickettsia	0	0	1	0	0	0	1	0	0	0	0	0
k__Bacteria|p__Proteobacteria|c__Betaproteobacteria|o__Burkholderiales|f__Alcaligenaceae|g__Paralcaligenes	0	0	0	0	0	0	1	0	1	0	0	0
k__Bacteria|p__Proteobacteria|c__Betaproteobacteria|o__Burkholderiales|f__Comamonadaceae|g__Acidovorax	0	0	0	2	0	0	0	0	0	0	0	0
k__Bacteria|p__Proteobacteria|c__Betaproteobacteria|o__Rhodocyclales|f__Rhodocyclaceae|g__Zoogloea	0	0	0	0	0	0	0	0	0	0	2	0
k__Bacteria|p__Proteobacteria|c__Deltaproteobacteria|o__Myxococcales|f__Cystobacterineae|g__	0	0	0	0	0	0	0	0	0	2	0	0
k__Bacteria|p__Proteobacteria|c__Epsilonproteobacteria|o__Campylobacterales|f__Campylobacteraceae|g__Arcobacter	0	0	0	0	0	0	1	0	1	0	0	0
k__Bacteria|p__Proteobacteria|c__Gammaproteobacteria|o__Alteromonadales|f__211ds20|g__	0	0	0	0	0	0	0	0	0	2	0	0
k__Bacteria|p__Proteobacteria|c__Gammaproteobacteria|o__Alteromonadales|f__Shewanellaceae|g__Shewanella	0	0	0	0	0	0	1	0	1	0	0	0
k__Bacteria|p__Proteobacteria|c__Gammaproteobacteria|o__Pseudomonadales|f__Moraxellaceae|g__Moraxella	2	0	0	0	0	0	0	0	0	0	0	0
k__Bacteria|p__Proteobacteria|c__Gammaproteobacteria|o__Vibrionales|f__Pseudoalteromonadaceae|g__Pseudoalteromonas	0	2	0	0	0	0	0	0	0	0	0	0
k__Bacteria|p__Verrucomicrobia|c__|o__|f__|g__	0	0	0	0	0	0	0	0	0	2	0	0
k__Bacteria|p__Verrucomicrobia|c__[Spartobacteria]|o__[Chthoniobacterales]|f__[Chthoniobacteraceae]|g__heteroC45_4W	0	0	0	0	0	0	1	0	0	0	0	1
k__Archaea|p__Euryarchaeota|c__Methanomicrobia|o__Methanosarcinales|f__Methanosarcinaceae|g__Methanosarcina	0	0	0	0	0	0	0	0	0	0	0	1
k__Archaea|p__Euryarchaeota|c__Methanomicrobia|o__YC-E6|f__|g__	0	0	0	0	0	0	0	0	0	0	0	1
k__Bacteria|p__Acidobacteria|c__DA052|o__Ellin6513|f__|g__	0	0	0	0	0	0	1	0	0	0	0	0
k__Bacteria|p__Acidobacteria|c__RB25|o__|f__|g__	0	0	0	0	0	0	1	0	0	0	0	0
k__Bacteria|p__Acidobacteria|c__[Chloracidobacteria]|o__|f__|g__	0	0	0	0	0	0	0	0	1	0	0	0
k__Bacteria|p__Actinobacteria|c__Acidimicrobiia|o__Acidimicrobiales|f__Iamiaceae|g__Iamia	0	0	0	0	0	0	0	0	1	0	0	0
k__Bacteria|p__Actinobacteria|c__Acidimicrobiia|o__Acidimicrobiales|f__koll13|g__	0	0	0	0	0	0	0	0	1	0	0	0
k__Bacteria|p__Actinobacteria|c__Actinobacteria|o__Actinomycetales|f__Actinosynnemataceae|g__Kibdelosporangium	0	0	0	0	0	0	0	0	0	1	0	0
k__Bacteria|p__Actinobacteria|c__Actinobacteria|o__Actinomycetales|f__Actinosynnemataceae|g__Kutzneria	0	0	0	0	0	0	0	0	1	0	0	0
k__Bacteria|p__Actinobacteria|c__Actinobacteria|o__Actinomycetales|f__Dermatophilaceae|g__Piscicoccus	0	0	0	0	0	0	0	0	0	1	0	0
k__Bacteria|p__Actinobacteria|c__Actinobacteria|o__Actinomycetales|f__Frankiaceae|g__Kaistibacter	0	0	0	0	0	0	0	0	0	0	1	0
k__Bacteria|p__Actinobacteria|c__Actinobacteria|o__Actinomycetales|f__Glycomycetaceae|g__Glycomyces	0	0	0	0	0	0	0	0	1	0	0	0
k__Bacteria|p__Actinobacteria|c__Actinobacteria|o__Actinomycetales|f__Intrasporangiaceae|g__Oryzihumus	0	0	0	0	0	0	0	0	1	0	0	0
k__Bacteria|p__Actinobacteria|c__Actinobacteria|o__Actinomycetales|f__Kineosporiaceae|g__Quadrisphaera	0	0	0	0	0	0	0	0	0	1	0	0
k__Bacteria|p__Actinobacteria|c__Actinobacteria|o__Actinomycetales|f__Micrococcaceae|g__Nesterenkonia	0	0	0	0	1	0	0	0	0	0	0	0
k__Bacteria|p__Actinobacteria|c__Actinobacteria|o__Actinomycetales|f__Pseudonocardiaceae|g__Saccharopolyspora	0	0	0	0	0	0	0	0	0	0	0	1
k__Bacteria|p__Actinobacteria|c__Actinobacteria|o__Actinomycetales|f__Streptomycetaceae|g__Streptacidiphilus	0	1	0	0	0	0	0	0	0	0	0	0
k__Bacteria|p__Armatimonadetes|c__Chthonomonadetes|o__Chthonomonadales|f__Chthonomonadaceae|g__	0	0	0	0	0	0	0	0	1	0	0	0
k__Bacteria|p__Armatimonadetes|c__SJA-176|o__GAB-B06|f__|g__	0	0	0	0	0	0	0	0	0	0	0	1
k__Bacteria|p__Armatimonadetes|c__SJA-176|o__RB046|f__|g__	0	0	0	0	0	0	0	0	0	0	1	0
k__Bacteria|p__Bacteroidetes|c__Bacteroidia|o__Bacteroidales|f__BS11|g__	0	0	0	0	0	0	1	0	0	0	0	0
k__Bacteria|p__Bacteroidetes|c__Bacteroidia|o__Bacteroidales|f__Bacteroidaceae|g__	0	0	0	0	0	0	1	0	0	0	0	0
k__Bacteria|p__Bacteroidetes|c__Bacteroidia|o__Bacteroidales|f__Porphyromonadaceae|g__Parabacteroides	0	0	0	0	0	0	1	0	0	0	0	0
k__Bacteria|p__Bacteroidetes|c__Flavobacteriia|o__Flavobacteriales|f__Cryomorphaceae|g__Fluviicola	0	0	0	0	0	0	0	0	0	0	1	0
k__Bacteria|p__Bacteroidetes|c__Flavobacteriia|o__Flavobacteriales|f__Flavobacteriaceae|g__Zhouia	0	0	0	0	0	0	0	0	0	0	0	1
k__Bacteria|p__Bacteroidetes|c__[Saprospirae]|o__[Saprospirales]|f__|g__	0	0	0	0	0	0	0	0	1	0	0	0
k__Bacteria|p__Chloroflexi|c__|o__|f__|g__	1	0	0	0	0	0	0	0	0	0	0	0
k__Bacteria|p__Chloroflexi|c__Chloroflexi|o__Chloroflexales|f__FFCH7168|g__	0	0	0	0	0	0	1	0	0	0	0	0
k__Bacteria|p__Chloroflexi|c__Chloroflexi|o__Chloroflexales|f__Oscillochloridaceae|g__Oscillochloris	0	0	0	0	0	0	1	0	0	0	0	0
k__Bacteria|p__Cyanobacteria|c__Nostocophycideae|o__Nostocales|f__Nostocaceae|g__	0	0	0	0	0	0	0	0	0	1	0	0
k__Bacteria|p__Cyanobacteria|c__Nostocophycideae|o__Nostocales|f__Nostocaceae|g__Nodularia	0	0	0	0	0	0	0	0	0	0	0	1
k__Bacteria|p__Cyanobacteria|c__Oscillatoriophycideae|o__Chroococcales|f__Xenococcaceae|g__	0	0	0	0	0	0	0	1	0	0	0	0
k__Bacteria|p__Elusimicrobia|c__Elusimicrobia|o__FAC88|f__|g__	0	0	0	0	0	0	0	0	0	0	1	0
k__Bacteria|p__Firmicutes|c__Bacilli|o__Bacillales|f__Bacillaceae|g__Thalassobacillus	0	0	0	0	0	0	0	0	0	0	1	0
k__Bacteria|p__Firmicutes|c__Bacilli|o__Bacillales|f__Pasteuriaceae|g__	0	0	0	0	0	0	0	0	0	0	1	0
k__Bacteria|p__Firmicutes|c__Bacilli|o__Bacillales|f__Planococcaceae|g__Staphylococcus	0	0	1	0	0	0	0	0	0	0	0	0
k__Bacteria|p__Firmicutes|c__Bacilli|o__Bacillales|f__Sporolactobacillaceae|g__Scopulibacillus	0	0	0	0	0	0	0	0	0	1	0	0
k__Bacteria|p__Firmicutes|c__Bacilli|o__Lactobacillales|f__Aerococcaceae|g__Abiotrophia	0	1	0	0	0	0	0	0	0	0	0	0
k__Bacteria|p__Firmicutes|c__Bacilli|o__Lactobacillales|f__Aerococcaceae|g__Alkalibacterium	0	0	0	0	0	0	1	0	0	0	0	0
k__Bacteria|p__Firmicutes|c__Clostridia|o__Clostridiales|f__Clostridiaceae|g__Proteiniclasticum	0	0	0	0	0	0	1	0	0	0	0	0
k__Bacteria|p__Firmicutes|c__Clostridia|o__Clostridiales|f__Eubacteriaceae|g__Garciella	0	0	1	0	0	0	0	0	0	0	0	0
k__Bacteria|p__Firmicutes|c__Clostridia|o__Clostridiales|f__Lachnospiraceae|g__Defluviitalea	0	0	0	0	0	0	1	0	0	0	0	0
k__Bacteria|p__Firmicutes|c__Clostridia|o__Clostridiales|f__Lachnospiraceae|g__Lachnospira	0	0	0	0	0	0	0	0	1	0	0	0
k__Bacteria|p__Firmicutes|c__Clostridia|o__Clostridiales|f__Lachnospiraceae|g__[Ruminococcus]	0	0	0	0	0	0	1	0	0	0	0	0
k__Bacteria|p__Firmicutes|c__Clostridia|o__Clostridiales|f__Peptococcaceae|g__Dehalobacter_Syntrophobotulus	0	0	0	0	0	0	0	0	1	0	0	0
k__Bacteria|p__Firmicutes|c__Clostridia|o__Clostridiales|f__Peptostreptococcaceae|g__Peptostreptococcus	1	0	0	0	0	0	0	0	0	0	0	0
k__Bacteria|p__Firmicutes|c__Clostridia|o__Clostridiales|f__Veillonellaceae|g__Selenomonas	0	0	0	0	0	0	0	0	0	0	1	0
k__Bacteria|p__Firmicutes|c__Clostridia|o__Clostridiales|f__[Acidaminobacteraceae]|g__	0	0	0	0	0	0	0	0	0	1	0	0
k__Bacteria|p__Firmicutes|c__Clostridia|o__Clostridiales|f__[Mogibacteriaceae]|g__	0	0	0	0	0	0	1	0	0	0	0	0
k__Bacteria|p__Firmicutes|c__Clostridia|o__Clostridiales|f__[Tissierellaceae]|g__Parvimonas	0	0	0	0	1	0	0	0	0	0	0	0
k__Bacteria|p__Firmicutes|c__Clostridia|o__Thermoanaerobacterales|f__Thermoanaerobacteraceae|g__	0	0	0	0	0	0	0	0	0	0	1	0
k__Bacteria|p__Gemmatimonadetes|c__Gemmatimonadetes|o__N1423WL|f__|g__	0	0	0	0	0	0	0	0	0	1	0	0
k__Bacteria|p__Proteobacteria|c__|o__|f__|g__	0	1	0	0	0	0	0	0	0	0	0	0
k__Bacteria|p__Proteobacteria|c__Alphaproteobacteria|o__BD7-3|f__|g__	0	0	0	0	0	0	0	0	0	0	1	0
k__Bacteria|p__Proteobacteria|c__Alphaproteobacteria|o__Caulobacterales|f__|g__	0	0	0	0	0	0	0	0	0	0	0	1
k__Bacteria|p__Proteobacteria|c__Alphaproteobacteria|o__Rhizobiales|f__Bradyrhizobiaceae|g__Afipia	0	0	0	0	1	0	0	0	0	0	0	0
k__Bacteria|p__Proteobacteria|c__Alphaproteobacteria|o__Rhizobiales|f__Methylocystaceae|g__Rhodoblastus	0	0	0	0	0	0	0	0	0	0	1	0
k__Bacteria|p__Proteobacteria|c__Alphaproteobacteria|o__Rhizobiales|f__Phyllobacteriaceae|g__Chelativorans	0	0	0	0	0	0	0	0	0	0	1	0
k__Bacteria|p__Proteobacteria|c__Alphaproteobacteria|o__Rickettsiales|f__Rickettsiaceae|g__	0	0	0	0	0	0	0	0	0	0	1	0
k__Bacteria|p__Proteobacteria|c__Alphaproteobacteria|o__Sphingomonadales|f__Sphingomonadaceae|g__Sphingosinicella	0	0	0	0	0	0	0	0	0	0	1	0
k__Bacteria|p__Proteobacteria|c__Betaproteobacteria|o__Burkholderiales|f__Comamonadaceae|g__Polaromonas	0	0	1	0	0	0	0	0	0	0	0	0
k__Bacteria|p__Proteobacteria|c__Betaproteobacteria|o__Burkholderiales|f__Oxalobacteraceae|g__Collimonas	0	0	0	0	0	0	0	0	0	0	0	1
k__Bacteria|p__Proteobacteria|c__Betaproteobacteria|o__Burkholderiales|f__Oxalobacteraceae|g__Massilia	0	0	0	0	0	0	1	0	0	0	0	0
k__Bacteria|p__Proteobacteria|c__Betaproteobacteria|o__Neisseriales|f__Neisseriaceae|g__Eikenella	0	0	0	0	0	0	0	0	0	0	1	0
k__Bacteria|p__Proteobacteria|c__Betaproteobacteria|o__Procabacteriales|f__Procabacteriaceae|g__Procabacter	0	0	0	0	0	0	1	0	0	0	0	0
k__Bacteria|p__Proteobacteria|c__Betaproteobacteria|o__Rhodocyclales|f__Rhodocyclaceae|g__Dechloromonas	0	0	0	0	0	0	0	0	1	0	0	0
k__Bacteria|p__Proteobacteria|c__Deltaproteobacteria|o__Myxococcales|f__Myxococcaceae|g__Myxococcus	0	0	0	0	0	0	0	0	0	0	1	0
k__Bacteria|p__Proteobacteria|c__Deltaproteobacteria|o__Myxococcales|f__Nannocystaceae|g__Plesiocystis	0	0	0	0	0	0	0	0	0	1	0	0
k__Bacteria|p__Proteobacteria|c__Epsilonproteobacteria|o__Campylobacterales|f__Campylobacteraceae|g__Sulfurospirillum	0	0	0	0	0	0	0	0	1	0	0	0
k__Bacteria|p__Proteobacteria|c__Gammaproteobacteria|o__Aeromonadales|f__|g__	0	0	1	0	0	0	0	0	0	0	0	0
k__Bacteria|p__Proteobacteria|c__Gammaproteobacteria|o__Alteromonadales|f__Alteromonadaceae|g__Marinobacter	0	0	0	0	0	0	0	1	0	0	0	0
k__Bacteria|p__Proteobacteria|c__Gammaproteobacteria|o__Enterobacteriales|f__Enterobacteriaceae|g__Cronobacter	0	0	0	0	0	0	0	1	0	0	0	0
k__Bacteria|p__Proteobacteria|c__Gammaproteobacteria|o__Legionellales|f__Coxiellaceae|g__Aquicella	0	0	0	0	0	0	1	0	0	0	0	0
k__Bacteria|p__Proteobacteria|c__Gammaproteobacteria|o__Oceanospirillales|f__Hahellaceae|g__Hahella	0	1	0	0	0	0	0	0	0	0	0	0
k__Bacteria|p__Proteobacteria|c__Gammaproteobacteria|o__Oceanospirillales|f__SUP05|g__	0	0	0	0	0	0	0	0	0	0	0	1
k__Bacteria|p__Proteobacteria|c__Gammaproteobacteria|o__Pasteurellales|f__Pasteurellaceae|g__	0	1	0	0	0	0	0	0	0	0	0	0
k__Bacteria|p__Proteobacteria|c__Gammaproteobacteria|o__Thiotrichales|f__Piscirickettsiaceae|g__Methylophaga	0	1	0	0	0	0	0	0	0	0	0	0
k__Bacteria|p__Proteobacteria|c__Gammaproteobacteria|o__Vibrionales|f__Vibrionaceae|g__Photobacterium	1	0	0	0	0	0	0	0	0	0	0	0
k__Bacteria|p__Proteobacteria|c__Gammaproteobacteria|o__Xanthomonadales|f__Sinobacteraceae|g__Hydrocarboniphaga	0	0	0	0	0	0	0	0	1	0	0	0
k__Bacteria|p__Spirochaetes|c__Spirochaetes|o__Spirochaetales|f__Spirochaetaceae|g__Spirochaeta	0	0	0	0	0	0	1	0	0	0	0	0
k__Bacteria|p__Tenericutes|c__RF3|o__ML615J-28|f__|g__	0	0	0	0	0	0	0	0	0	0	0	1
k__Bacteria|p__Verrucomicrobia|c__Opitutae|o__Opitutales|f__Opitutaceae|g__	0	0	0	0	0	0	0	0	0	0	1	0
k__Bacteria|p__Verrucomicrobia|c__[Spartobacteria]|o__[Chthoniobacterales]|f__[Chthoniobacteraceae]|g__OR-59	0	0	0	0	0	0	1	0	0	0	0	0
k__Bacteria|p__[Thermi]|c__Deinococci|o__Deinococcales|f__Trueperaceae|g__	0	0	0	0	0	0	0	0	1	0	0	0
Total	8928	7918	31313	69376	67358	44068	76368	142532	40090	38063	58616	16179
